# Supplementary material for: Daycare attendance and respiratory tract infections: a prospective birth cohort study
Source: PubMed Central journal article supplement — BMJ Open. 2017 Sep 5;7(9):e014635. doi: 10.1136/bmjopen-2016-014635 (PMC5588939; doi:10.1136/bmjopen-2016-014635), 2017-09-05
Supplement: bmjopen-2016-014635.draft_revisions.pdf [file bmjopen-2016-014635.draft_revisions.pdf]

# BMJ Open

## Daycare attendance and respiratory tract infections: a prospective birth cohort study

|                                 |                                                                                                                                                                                                                                                                                                                                                                                                                                                                                                                                                                                                                                                                                                                                                         |
|---------------------------------|---------------------------------------------------------------------------------------------------------------------------------------------------------------------------------------------------------------------------------------------------------------------------------------------------------------------------------------------------------------------------------------------------------------------------------------------------------------------------------------------------------------------------------------------------------------------------------------------------------------------------------------------------------------------------------------------------------------------------------------------------------|
| Journal:                        | <i>BMJ Open</i>                                                                                                                                                                                                                                                                                                                                                                                                                                                                                                                                                                                                                                                                                                                                         |
| Manuscript ID                   | bmjopen-2016-014635                                                                                                                                                                                                                                                                                                                                                                                                                                                                                                                                                                                                                                                                                                                                     |
| Article Type:                   | Research                                                                                                                                                                                                                                                                                                                                                                                                                                                                                                                                                                                                                                                                                                                                                |
| Date Submitted by the Author:   | 07-Oct-2016                                                                                                                                                                                                                                                                                                                                                                                                                                                                                                                                                                                                                                                                                                                                             |
| Complete List of Authors:       | Schuez-Havupalo, Linnea; Turku University Hospital, Department of Paediatrics and Adolescent Medicine; Turun Yliopisto, Turku Institute for Child and Youth Research<br>Toivonen, Laura; Turku University Hospital, Department of Paediatrics and Adolescent Medicine; Turun Yliopisto, Turku Institute for Child and Youth Research<br>Karppinen, Sinikka; Turku University Hospital, Department of Paediatrics and Adolescent Medicine; Turun Yliopisto, Turku Institute for Child and Youth Research<br>Kaljonen, Anne; Turun Yliopisto, Turku Institute for Child and Youth Research<br>Peltola, Ville; Turku University Hospital, Department of Paediatrics and Adolescent Medicine; Turun Yliopisto, Turku Institute for Child and Youth Research |
| <b>Primary Subject Heading</b>: | Paediatrics                                                                                                                                                                                                                                                                                                                                                                                                                                                                                                                                                                                                                                                                                                                                             |
| Secondary Subject Heading:      | Infectious diseases                                                                                                                                                                                                                                                                                                                                                                                                                                                                                                                                                                                                                                                                                                                                     |
| Keywords:                       | Respiratory infections < THORACIC MEDICINE, Paediatric infectious disease & immunisation < PAEDIATRICALS, Community child health < PAEDIATRICALS                                                                                                                                                                                                                                                                                                                                                                                                                                                                                                                                                                                                        |
|                                 |                                                                                                                                                                                                                                                                                                                                                                                                                                                                                                                                                                                                                                                                                                                                                         |

SCHOLARONE™  
Manuscripts

1  
2  
3  
4  
5  
6  
7  
8  
9  
10  
11  
12  
13  
14  
15  
16  
17  
18  
19  
20  
21  
22  
23  
24  
25  
26  
27  
28  
29  
30  
31  
32  
33  
34  
35  
36  
37  
38  
39  
40  
41  
42  
43  
44  
45  
46  
47  
48  
49  
50  
51  
52  
53  
54  
55  
56  
57  
58  
59  
60

# Daycare attendance and respiratory tract infections: a prospective birth cohort study

Linnea Schuez-Havupalo, MD,<sup>1,2</sup> Laura Toivonen, MD,<sup>1,2</sup> Sinikka Karppinen, MD,<sup>1,2</sup> Anne Kaljonen, BSc,<sup>2</sup> and Ville Peltola, MD, PhD<sup>1,2</sup>

**Affiliations:** <sup>1</sup>Department of Paediatrics and Adolescent Medicine, Turku University Hospital; and <sup>2</sup>Turku Institute for Child and Youth Research, University of Turku, Turku, Finland

**Correspondence to:** Ville Peltola, MD, PhD, Department of Paediatrics and Adolescent Medicine, Turku University Hospital, 20521 Turku, Finland; ville.peltola@utu.fi; tel. +358-2-3130000; fax: +358-2-3131460.

**Keywords:** daycare, respiratory infections, children, the STEPS Study

**Word count:** 2499

## Abstract

**Objective.** We explored the burden of respiratory tract infections in young children with regard to daycare initiation.

**Design.** Longitudinal prospective birth cohort study.

**Setting and method.** We recruited 1827 children for follow-up until the age of 24 months collecting diary data on respiratory tract infections and daycare. Children with continuous daycare type and complete data were divided into groups of centre-based daycare (n=299), family daycare (n=245), and home care (n=350). Using repeated measures variance analyses, we analysed days per month with symptoms of respiratory tract infection, antibiotic treatments, and parental absence from work for a period of 6 months prior to and 9 months after the start of daycare.

**Results.** We documented a significant effect of time and type of daycare, as well as a significant interaction between them for all outcome measures. There was a rise in mean days with symptoms from 3.79 (95% CI 3.04-4.53) during the month preceding centre-based daycare to 10.57 (95% CI 9.35-11.79) at 2 months after the start of centre-based daycare, with a subsequent decrease within the following 9 months. Similar patterns with a rise and decline were observed in the use of antibiotics and parental absences. The start of family daycare had weaker effects. Our findings were not changed when taking into account confounding factors.

**Conclusions.** Our study shows the rapid increase in respiratory infections after start of daycare and a relatively fast decline in the course of time with continued daycare. It is important to support families around the beginning of daycare.

## Article summary

### Strength and limitations of this study

- We prospectively collected detailed day-to-day diary data on respiratory tract infections and related outcomes from 0 to 2 years of age in a birth cohort population, and documented daycare type and starting date.
- The study design allowed us to analyze the time-dependent effects of centre-based daycare and family daycare on the days per month with symptoms of a respiratory infection in comparison with children of same age in home care.
- Different confounders were taken into account, but they did not change our findings of a peak in the rate of respiratory tract infections shortly after daycare initiation, and a clear decline thereafter.
- A limitation is that, due to strict requirements regarding detail in follow up and careful exclusion of missing data, we lost a substantial proportion of cases.

## Introduction

In modern society a considerable proportion of children attend daycare from the age of less than two years. Respiratory tract infections (RTIs) in this age group constitute an important health problem. In addition to causing stress to children and families, they also affect transmission of pathogens to other age groups, parental absences from work with ensuing economic consequences, and rates of anti-microbial medication use with subsequent impact on resistance patterns.[1-3] Previous studies suggest that increased rates of infections may be a transient problem related to the beginning of daycare,[4-7] but results are conflicting. Few prospective cohort studies have examined the topic, and lose frequency of follow-up has limited chronological conclusions. Some studies have found a protective effect of starting daycare early with regard to RTIs later in life.[4, 8]

Families, child health care professionals, and daycare providers would benefit from more detailed knowledge about the burden of disease as a function of time before and after the start of daycare in the above mentioned age group. We examined this in a prospectively followed birth cohort.

## Methods

### Study population and conduct

We used the cohort of the observational 'Steps to the Healthy Development and Well-being of Children' Study (The STEPS Study), which consists of 1827 children from 1797 families.[9] Recruitment occurred in two stages from women with a live birth between 1 January 2008 and 31 March 2010 in the Southwest Finland Hospital District (n=9936). During the first stage, 1387 families were recruited through community midwifery services during pregnancy, and a further 410 families joined the study soon after the birth of their child. In this study we collected questionnaire-based data on family related factors and

1  
2  
3 daycare arrangements at gestational week 20, and at ages 13 months, 18 months, and 24  
4  
5 months, as applicable. Families kept study diaries that recorded health related factors, the  
6  
7 precise starting date of daycare, and data from physician visits. Parents documented the  
8  
9 child's symptoms, antibiotic treatments, and parental absence from work on a day-to-day  
10  
11 basis in these diaries. Parents were instructed to also mark symptom-free days in the diary.  
12  
13 We differentiated missing from negative data by excluding follow-up with no diary markings.  
14  
15

16 Families attended our nurse-led study clinic when the child was 2 and 13 months of  
17  
18 age. During RTIs part of the cohort (n=982) were also followed up by our physician-led study  
19  
20 clinic. Recruitment of children to our study is shown in figure 1. Exclusion criteria for this  
21  
22 study constituted discontinuous daycare during our follow-up, or insufficient information on  
23  
24 daycare arrangements including missing knowledge on the exact time of start of daycare. The  
25  
26 Ethics Committee of the Hospital District of Southwest Finland approved the study protocol.  
27  
28 The parents of the participating children gave their written, informed consent.  
29  
30  
31  
32  
33

### 34 **Daycare attendance**

35  
36 Children were categorized into three different groups according to daycare arrangements:  
37  
38 children cared for by parents or relatives (comparison group), children attending family  
39  
40 daycare (FDC), and children attending daycare centres (DCC). In this study family daycare  
41  
42 was defined as daycare provided by a trained carer in her or his home, or in the children's  
43  
44 homes using a rotational system. According to local regulations, FDC group sizes included  
45  
46 no more than 5 children. In rare cases, carers worked together forming a common nursery.  
47  
48 Since group sizes tended to be relatively small in those nurseries, these children were  
49  
50 included in the FDC group. Daycare centres were defined by larger-group, centre-based care  
51  
52 provided by several professional carers. FDC and care in DCCs were provided either by the  
53  
54 municipality or on a private basis.  
55  
56  
57  
58  
59  
60

## Outcomes

The outcomes of the study were symptoms of RTIs (cough, rhinorrhea, fever, or wheeze), consumption of antibiotic medication, and parental absence from work as recorded on a day-to-day basis in the study diaries. Antibiotic medications prescribed for any reason were included, but the main indication was acute otitis media. Any parental absence from work due to the child's illness was recorded, and reasons were not limited to RTIs. Final outcome measures constituted days per month with RTI symptoms (sick days), antibiotic medication, and parental absence from work.

## Confounding factors

The following potential confounders were taken into consideration: sex, siblings, season of year at start of daycare, asthma in the parents, pets (cats or dogs at home), and maternal post-secondary education.[10-12] There was only a small proportion of families with known smoking in parents (127 out of 1827), and since our results strongly indicated reporting bias, this variable was excluded from the analyses.

## Statistical analysis

All statistical analyses were carried out using SAS version 9.4 (SAS, Cary, NC, USA). In all our analyses p values less than 0.05 were regarded as statistically significant. In the first step, outcome variables were calculated as days per month for each child and aligned in a time sequence relating to the beginning of daycare. Day-specific chronological follow-up included a time of 6 months previous to and 9 months after the beginning of daycare. Children commenced daycare at different ages, so that not all above defined data related to the fixed age frame of 0-2 years. Data from outside the agreed age frame were excluded from the

1  
2  
3 analysis using the SAS MIXED procedure. Chronological data for the comparison group  
4  
5 were obtained from children at equivalent ages not attending daycare. The equivalent age  
6  
7 range was calculated using the mean age of starting daycare in the FDC and DCC groups.  
8  
9 According to this mean age, follow-up of children within the comparison group included the  
10  
11 age range of 9 to 24 months (6 months prior to and 9 months after the mean start of daycare  
12  
13 at 15 months).

14  
15  
16 Data were analyzed by repeated measures variance analysis comparing all three  
17  
18 groups for type of daycare and time, as well as their interaction. In a second step,  
19  
20 chronological thresholds of significance were obtained by comparing all p values for the  
21  
22 difference of least square means between all pairs of analyzed months. We determined the  
23  
24 shortest time for any given trend with a  $p < 0.05$ . Although the distributions of monthly  
25  
26 outcome variables (sick days, days with antibiotic treatment, and parental absence from  
27  
28 work) were skewed in our analyses (coefficient of skewness up to 2.4 and kurtosis 7.6), the  
29  
30 pairwise difference variables followed approximately a normal distribution.  
31  
32

33  
34 In a third step, repeated measures variance analysis was repeated according to the  
35  
36 previous model, but stratifying according to individual confounding factors.  
37  
38

## 39 40 41 **Results**

42  
43 Figure 1 shows numbers of children within follow-up. Within our cohort of 1570 children in  
44  
45 active follow-up, 276 (21.8%) of 1264 children with data on daycare arrangements at age 13  
46  
47 months attended daycare (11.7% in DCC, 10.1% in FDC) and 593 (55.0%) of 1079 children  
48  
49 attended daycare at the age of 24 months (29.5% in DCC and 25.0% in FDC). At all ages the  
50  
51 vast majority of children in daycare spent over 5 hours per day at daycare (88.5% at age 13  
52  
53 months and 91.6% at age 24 months). Group sizes were clearly smaller for children attending  
54  
55 FDC as compared to DCC, with 88.3% (at 13 months) to 82.7% (at 24 months) of families  
56  
57  
58  
59  
60



1  
2  
3 reporting a group size of less than 5 children per group. In DCC group sizes were variable  
4  
5 with the following results for the ages of 13 months (and 24 months): less than 5 children for  
6  
7 2.0%, 5-15 children for 86.8%, over 15 children for 11.1% (less than 5 children for 1.4%, 5-  
8  
9 15 children for 87.8%, over 15 children for 10.9%). Mean age at the beginning of daycare  
10  
11 was 15 months (SD 4.1). Sex was evenly distributed throughout the daycare groups with  
12  
13 49.1% of boys in the comparison group, 50.6% in FDC, and 54.2% in DCC. Start of daycare  
14  
15 (FDC or DCC) occurred in 38.2% of cases during fall-winter (October to March) and in  
16  
17 61.8% during spring-summer (April to September). Within the comparison, FDC, and DCC  
18  
19 groups, 97.5% of children were born full-term (gestational age equal to, or over 37 weeks),  
20  
21 with only 5/894 children (0.6%) having been born at a gestational age of less than 35 weeks.  
22  
23  
24

25  
26 There was a peak of mean sick days per month at 2 months after the start of daycare  
27  
28 for both FDC and DCC (figure 2). The rise in sick days was stronger for the DCC group than  
29  
30 for the FDC group. We observed increases from 3.53 mean sick days (95% CI 2.83-4.24)  
31  
32 during the month prior to the start of daycare to 8.34 mean sick days per month (95% CI  
33  
34 7.25-9.43) for the FDC group, and from 3.79 (95% CI 3.04-4.53) mean sick days prior to the  
35  
36 start of daycare to 10.57 (95% CI 9.35-11.79) mean sick days per month for the DCC group.  
37  
38 For both of these groups, the rise of outcome measures was a transient phenomenon; sick  
39  
40 days were comparable to the baseline group at 5 months after the start of daycare. Antibiotic  
41  
42 use (figure 3) and parental absences from work because of children's illnesses (figure 4) rose  
43  
44 and declined according to a pattern similar to that observed in sick days in relation to the start  
45  
46 of daycare, although this decline was less pronounced compared to sick days.  
47  
48

49  
50 The shortest time for a significant rise of outcome measures was determined from the  
51  
52 last month prior to starting daycare (month -1) and for a significant decline from the peak of  
53  
54 each outcome variable. The rise in sick days (figure 2) and antibiotic use (figure 3) was more  
55  
56  
57  
58  
59  
60

1  
2  
3  
4  
5  
6  
7  
8  
9  
10  
11  
12  
13  
14  
15  
16  
17  
18  
19  
20  
21  
22  
23  
24  
25  
26  
27  
28  
29  
30  
31  
32  
33  
34  
35  
36  
37  
38  
39  
40  
41  
42  
43  
44  
45  
46  
47  
48  
49  
50  
51  
52  
53  
54  
55  
56  
57  
58  
59  
60

rapid among children starting DCC than in those starting FDC. Within the comparison group there were no significant findings in pairwise comparisons between months.

In repeated measures variance analyses there was a significant overall effect for time and type of daycare and their interaction for all outcome measures (table 1).

For peer review only

**Table 1.** P values\* for the effects of daycare type and time on the rates of RTI symptoms (sick days), antibiotic treatments, and parental absence from work because of a child's illness

|                                    | Sick days per month, p | Days with antibiotic treatment per month, p | Parental absence from work, days per month, p |
|------------------------------------|------------------------|---------------------------------------------|-----------------------------------------------|
| Time (month)                       | <0.0001                | 0.004                                       | 0.003                                         |
| Daycare type                       | <0.0001                | <0.001                                      | 0.02                                          |
| Contrast: comparison - FDC groups  | 0.55                   | 0.18                                        | ND                                            |
| Contrast: comparison - DCC groups  | <0.0001                | <0.001                                      | ND                                            |
| Contrast: FDC - DCC groups         | <0.001                 | 0.04                                        | ND                                            |
| Interaction: time and daycare type | <0.0001                | <0.0001                                     | 0.003                                         |
| Time (month) for comparison group  | 0.005                  | 0.64                                        | ND                                            |
| Time (month) for FDC group         | <0.0001                | 0.002                                       | <0.0001                                       |
| Time (month) for DCC group         | <0.0001                | <0.0001                                     | <0.0001                                       |

ND, not determined; RTI, respiratory tract infection; FDC, family daycare; DCC, daycare centre.

\*By repeated measures variance analysis.

1  
2  
3 This interaction showed the above described pattern of rise and decline, which was strongest  
4  
5 for the DCC group and weaker for the FDC group. Within the comparison group there was no  
6  
7 such pattern, but significant variation was observed in the frequency of sick days per month  
8  
9 over time. When analyzing contrasts in sick days and antibiotic use between different types  
10  
11 of daycare without the aspect of time, only the DCC group reached significance in  
12  
13 comparison to the baseline group and FDC group.  
14  
15

16 The presence of older siblings in the family and higher post-secondary education in  
17  
18 mothers were associated with a higher burden of disease (table 2).  
19  
20  
21  
22  
23  
24  
25  
26  
27  
28  
29  
30  
31  
32  
33  
34  
35  
36  
37  
38  
39  
40  
41  
42  
43  
44  
45  
46  
47  
48  
49  
50  
51  
52  
53  
54  
55  
56  
57  
58  
59  
60

**Table 2.** Effects of confounding factors on the rates of RTI symptoms (sick days) according to daycare type.

|                                                     | Type of daycare  |                                |                 |                                |                 |                                | P*    | P for interaction with mode of daycare |
|-----------------------------------------------------|------------------|--------------------------------|-----------------|--------------------------------|-----------------|--------------------------------|-------|----------------------------------------|
|                                                     | Comparison group |                                | Family daycare  |                                | Daycare centre  |                                |       |                                        |
|                                                     | n/N (%)          | Sick days per month, mean (SD) | n/N (%)         | Sick days per month, mean (SD) | n/N (%)         | Sick days per month, mean (SD) |       |                                        |
| Older siblings                                      |                  |                                |                 |                                |                 |                                | 0.02  | <0.0001                                |
| Yes                                                 | 162/ 350 (46.3)  | 5.55 (3.72)                    | 99 /245 (40.4)  | 5.26 (3.33)                    | 132/ 299 (44.1) | 5.10 (3.72)                    |       |                                        |
| No                                                  | 188/ 350 (53.7)  | 4.16 (2.95)                    | 146/ 245 (59.6) | 4.58 (3.59)                    | 167/ 299 (55.9) | 5.88 (4.31)                    |       |                                        |
| Higher post-secondary education in mother           |                  |                                |                 |                                |                 |                                | 0.009 | 0.27                                   |
| Yes                                                 | 211/ 341 (61.9)  | 5.12 (3.53)                    | 161/ 239 (67.4) | 5.12 (3.72)                    | 203/ 293 (69.3) | 5.66 (3.75)                    |       |                                        |
| No                                                  | 130/ 341 (38.1)  | 4.40 (3.17)                    | 78 / 239 (32.6) | 4.23 (2.97)                    | 90/ 293 (30.7)  | 5.45 (4.79)                    |       |                                        |
| Start of daycare during fall-winter (October-March) |                  |                                |                 |                                |                 |                                | 0.39  | 0.61                                   |
| Yes                                                 | ND               | ND                             | 100/ 245 (40.8) | 4.90 (3.15)                    | 108/ 299 (36.1) | 5.69 (4.21)                    |       |                                        |
| No                                                  | ND               | ND                             | 145/ 245 (59.2) | 4.82 (3.73)                    | 191/ 299 (63.9) | 5.45 (4.0)                     |       |                                        |
| Asthma in parents                                   |                  |                                |                 |                                |                 |                                | 0.95  | 0.72                                   |
| Yes                                                 | 35/ 340 (10.3)   | 4.65 (3.26)                    | 26/ 234 (11.1)  | 5.54 (4.0)                     | 30/ 287 (10.5)  | 5.83 (4.25)                    |       |                                        |
| No                                                  | 305/ 340 (89.7)  | 4.86 (3.43)                    | 208/ 234 (88.9) | 4.76 (3.45)                    | 257/ 287 (89.5) | 5.56 (4.08)                    |       |                                        |
| Cat or dog at home                                  |                  |                                |                 |                                |                 |                                | 0.31  | 0.23                                   |
| Yes                                                 | 94/ 295 (31.9)   | 4.43 (3.07)                    | 80/ 196 (40.8)  | 4.83 (3.07)                    | 57/ 219 (26.0)  | 5.80 (4.28)                    |       |                                        |
| No                                                  | 201/ 295 (68.1)  | 5.14 (3.48)                    | 116/ 196 (59.2) | 4.92 (3.14)                    | 162/ 219 (74.0) | 5.68 (3.66)                    |       |                                        |

n/N, number of children per number of those with data available; ND, not determined; RTI, respiratory tract infection.

\*By univariate analysis, regardless of daycare type.

1 In repeated measures variance analyses stratified according to confounding factors,  
2  
3 associations remained ( $p < 0.0001$  for the effect of time and  $p < 0.001$  for daycare type for all  
4  
5 analyses, except for those with parental asthma, where  $p = 0.004$  for daycare type). Online  
6  
7 supplementary figures S1 and S2 illustrate the association of start of daycare with respiratory  
8  
9 tract infections in children stratified according to the presence of siblings and maternal post-  
10  
11 secondary education. For children without older siblings, the rise of sick days per month after  
12  
13 start of daycare was more pronounced than for those with older siblings.  
14  
15  
16  
17  
18  
19

## 20 Discussion

21  
22 In this study there was a strong but temporally limited effect of daycare initiation on the rate  
23  
24 of RTIs. This was strongest for the DCC group and weaker for the FDC group. An effect of  
25  
26 overall time in daycare,[4-7] as well as daycare type, on infections has been documented in  
27  
28 previous studies.[5, 13-15] Our study specifically focused on RTI dynamics around the start  
29  
30 of daycare.  
31  
32

33 We analyzed three main outcome measures. After showing a peak, the rate of sick  
34  
35 days returned near to baseline within our 9-month follow-up period from the start of daycare;  
36  
37 for antibiotic use there was more scatter with a less pronounced decline, and parental absence  
38  
39 from work did not return to baseline, which was to be expected due to the fact that both  
40  
41 parents tend to be at work after the start of daycare. Consideration of confounders did not  
42  
43 change our findings. The effect of older siblings on infections in relation to daycare has been  
44  
45 previously described,[7] and our findings are in line with previous results.  
46  
47  
48

49 We obtained a small, but significant effect for overall time in our analysis for sick  
50  
51 days also within the comparison group of children in home care. There was no consistent  
52  
53 trend over time, but rather a random variation between different months in the comparison  
54  
55 group. The effects of virus epidemics and season of year were minimized by the way the  
56  
57 baseline group was formed, but they cannot be completely excluded.  
58  
59  
60

1  
2 We consider the main strength of our study the detailed follow-up on a day-to-day  
3 basis for a relatively large number of cases and in chronological relation to the start of  
4 daycare. Previous cohort studies mostly assessed data from follow-up with intervals of  
5 months or longer periods and without information on the exact starting point of daycare, such  
6 that detailed chronological analyses for the time around the start of daycare could not be  
7 carried out.[5, 6, 8, 12] Retrospective collection of data relating to symptoms poses problems  
8 in some other studies, since it strongly relies on parents' memories.  
9

10  
11  
12  
13  
14  
15  
16  
17 There are some limitations to our study. Follow-up time was relatively short albeit  
18 sufficient to demonstrate the above described effects. Outcome measures were based on self-  
19 reported data and are thus subject to bias. Daily diary-keeping demanded regular participation  
20 of families, although diaries were concise and easily completed. There were several indicators  
21 that, for the small number of families with known smoking, diaries were not completed as  
22 comprehensively as in the rest of the cohort, so that we had to exclude parental smoking as a  
23 confounder from our study. The group with more detailed follow-up during infections had  
24 access to our medical services free of charge, and thus may have been more motivated to  
25 accurately document all experienced events. Inclusion into this group was offered to all  
26 families without any selection criteria.  
27  
28  
29  
30  
31  
32  
33  
34  
35  
36  
37  
38

39  
40 Due to strict requirements for comprehensive follow-up and careful exclusion of  
41 missing data, we lost a considerable proportion of cases. In order to screen for bias, a  
42 comparison of background variables was performed for non-responders and responders at 13  
43 months of age, and there were only minor differences between groups.[9]  
44  
45  
46  
47

48  
49 Our cohort children had less often older siblings than all eligible children, and their  
50 mothers had higher education and occupational status.[9] Otherwise our cohort represents the  
51 Southwest Finnish population well. Although lower socioeconomic class has traditionally  
52 been linked to an increased rate of infectious diseases,[16] a Swedish study found an  
53 association between low social status, smaller likelihood to be cared for in out-of-home care,  
54  
55  
56  
57  
58  
59  
60

1 and lesser consumption of medical services.[17] Within our cohort, social status, as indicated  
2  
3  
4 by maternal education, was also reflected by a higher rate of RTIs, but this did not affect our  
5  
6 findings relating to daycare.  
7  
8  
9

## 10 **Conclusion**

11  
12 In this longitudinal cohort study, the respiratory infectious disease burden was clearly related  
13  
14 to out-of-home care, but it decreased already within a short follow-up time of 9 months after  
15  
16 the start of daycare. These findings have implications on a correctly focused approach when  
17  
18 supporting families with small children. Families, daycare providers and pediatricians may be  
19  
20 reassured of the transient nature of increased RTIs after the start of daycare.  
21  
22  
23  
24  
25  
26  
27  
28  
29  
30  
31  
32  
33  
34  
35  
36  
37  
38  
39  
40  
41  
42  
43  
44  
45  
46  
47  
48  
49  
50  
51  
52  
53  
54  
55  
56  
57  
58  
59  
60



## Acknowledgments

We are extremely grateful to all the families who took part in this study, the midwives for their help in recruiting them, and the whole STEPS Study team, which includes our research physicians and study nurses.

## Footnotes

**Competing interests.** The authors have no competing interests.

**Funding.** All phases of this study were supported by the University of Turku; the Åbo Akademi University; the Turku University Hospital; the Academy of Finland, Grants no. 123571, 140251, and 277535; the Foundation for Pediatric Research, Finland; and Research Funds from Specified Government Transfers, Hospital District of Southwest Finland. Dr. Schuez-Havupalo was also supported by the Turku University Foundation.

**Data sharing statement:** Enquiries regarding extra data can be emailed to Ville Peltola.

**Contributors.** LSH contributed to conception and design, the clinical follow-up and data collection, carried out data analyses, drafted the initial manuscript, and approved the final manuscript as submitted. LT and SK contributed to conception and design, the clinical follow-up and data collection, reviewed and revised the manuscript, and approved the final manuscript as submitted. AK contributed to conception and design, coordinated data collection, carried out data analyses, reviewed and revised the manuscript, and approved the final manuscript as submitted. VP conceptualized and designed the study, coordinated and supervised data collection and analyses, reviewed and revised the manuscript, and approved the final manuscript as submitted.

## References

- 1 Nurmi T, Salminen E, Pönkä A. Infections and other illnesses of children in day-care centers in Helsinki. II: The economic losses. *Infection* 1991;19:331-5.
- 2 Holmes SJ, Morrow AL, Pickering LK. Child-care practices: effects of social change on the epidemiology of infectious diseases and antibiotic resistance. *Epidemiol Rev* 1996;18:10-28.
- 3 Thrane N, Olesen C, Mortensen JT, et al. Influence of day care attendance on the use of systemic antibiotics in 0- to 2-year-old children. *Pediatrics* 2001;107:e76.
- 4 Hurwitz ES, Gunn WJ, Pinsky PF, et al. Risk of respiratory illness associated with day-care attendance: a nationwide study. *Pediatrics* 1991;87:62-9.
- 5 The National Institute of Child Health and Human Development Early Child Care Research Network. Child care and common communicable illnesses: results from the National Institute of Child Health and Human Development Study of Early Child Care. *Arch Pediatr Adolesc Med* 2001;155:481-8.
- 6 Zutavern A, Rzehak P, Brockow I, et al. Day care in relation to respiratory-tract and gastrointestinal infections in a German birth cohort study. *Acta Paediatr* 2007;96:1494-9.
- 7 Kamper-Jørgensen M, Wohlfahrt J, Simonsen J, et al. Population-based study of the impact of childcare attendance on hospitalizations for acute respiratory infections. *Pediatrics* 2006;118:1439-46.
- 8 Cote S, Petitclerc A, Raynault M-F, et al. Short- and long-term risk of infections as a function of group child care attendance. *Arch Pediatr Adolesc Med* 2010;164:1132-7.
- 9 Lagström H, Rautava P, Kaljonen A, et al. Cohort profile: Steps to the healthy development and well-being of children (the STEPS study). *Int J Epidemiol* 2013;42:1273-84.

- 1  
2  
3  
4  
5  
6  
7  
8  
9  
10  
11  
12  
13  
14  
15  
16  
17  
18  
19  
20  
21  
22  
23  
24  
25  
26  
27  
28  
29  
30  
31  
32  
33  
34  
35  
36  
37  
38  
39  
40  
41  
42  
43  
44  
45  
46  
47  
48  
49  
50  
51  
52  
53  
54  
55  
56  
57  
58  
59  
60
- 10 Hatakka K, Piirainen L, Pohjavuori S, et al. Factors associated with acute respiratory illness in day care children. *Scand J Infect Dis* 2010;42:704-11.
- 11 Koopman LP, Smit HA, Heijnen ML, et al. Respiratory infections in infants: interaction of parental allergy, child care, and siblings - the PIAMA study. *Pediatrics* 2001;108:943-8.
- 12 Celedon J, Litonjua A, Weiss S, et al. Day care attendance in the first year of life and illness of the upper and lower respiratory tract in children with a familial history of atopy. *Pediatrics* 1999;104:495-500.
- 13 Hardy AM, Fowler MG. Child care arrangements and repeated ear infections in young children. *Am J Public Health* 1993;83:1321-5.
- 14 Marx J, Osguthorpe J, Parsons G. Day care and the incidence of otitis media in young children. *Otolaryngol Head Neck Surg* 1995;112:695-9.
- 15 Louhiala P, Jaakkola N, Ruotsalainen R, et al. Form of day care and respiratory infections among Finnish children. *Am J Public Health* 1995;85:1109-12.
- 16 Cohen S. Social status and susceptibility to respiratory infections. *Ann N Y Acad Sci* 1999;896:246-53.
- 17 Hjern A, Haglund B, Rasmussen F, et al. Socio-economic differences in daycare arrangements and use of medical care and antibiotics in Swedish preschool children. *Acta Paediatr* 2000;89:1250-6.

## Figure legends

**Figure 1.** Flow-diagram of the recruitment and follow-up of study children.

**Figure 2.** Means and 95% CIs (dashed lines) of sick days per month according to daycare groups in relation to start of daycare. Negative months denote the period prior to start of daycare. Horizontal lines indicate the shortest time for a significant rise (decline) from the last month prior to starting daycare (from the peak month).

**Figure 3.** Means and 95% CIs (dashed lines) of days with antibiotic treatment per month according to daycare groups in relation to start of daycare. Negative months denote the period prior to start of daycare. Horizontal lines indicate the shortest time for a significant rise (decline) from the last month prior to starting daycare (from the peak month). Dashed lines: transiently below the significance level.

**Figure 4.** Means and 95% CIs (dashed lines) of days with parental absence from work per month according to daycare groups in relation to start of daycare. Negative months denote the period prior to start of daycare. Horizontal lines indicate the shortest time for a significant rise (decline) from the last month prior to starting daycare (from the peak month). Dashed lines: transiently below the significance level.

1  
2  
3  
4  
5  
6  
7  
8  
9  
10  
11  
12  
13  
14  
15  
16  
17  
18  
19  
20  
21  
22  
23  
24  
25  
26  
27  
28  
29  
30  
31  
32  
33  
34  
35  
36  
37  
38  
39  
40  
41  
42  
43  
44  
45  
46  
47  
48  
49  
50  
51  
52  
53  
54  
55  
56  
57  
58  
59  
60

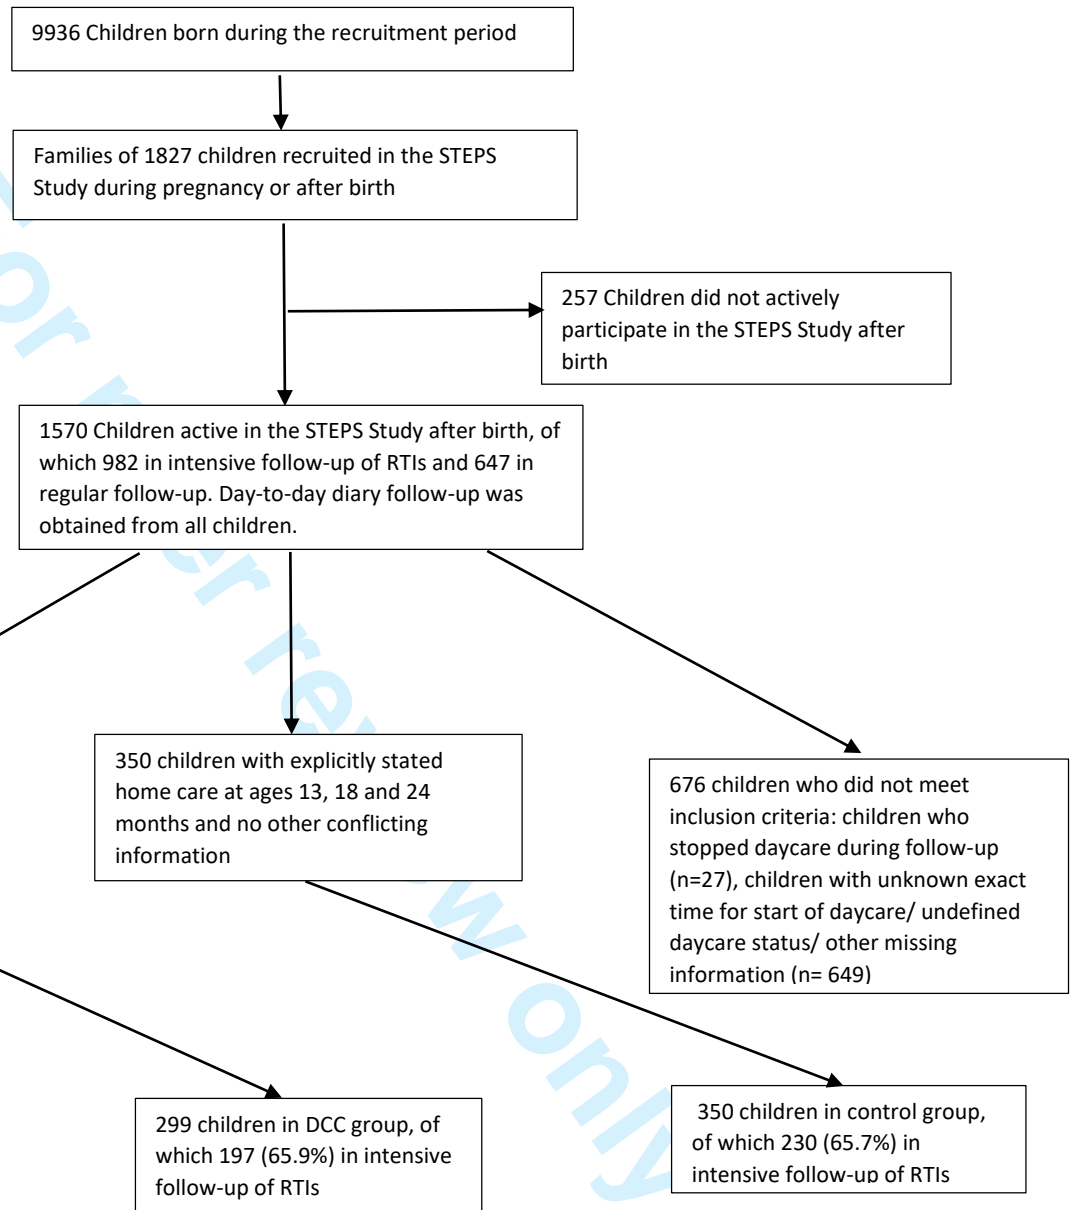

Figure 1

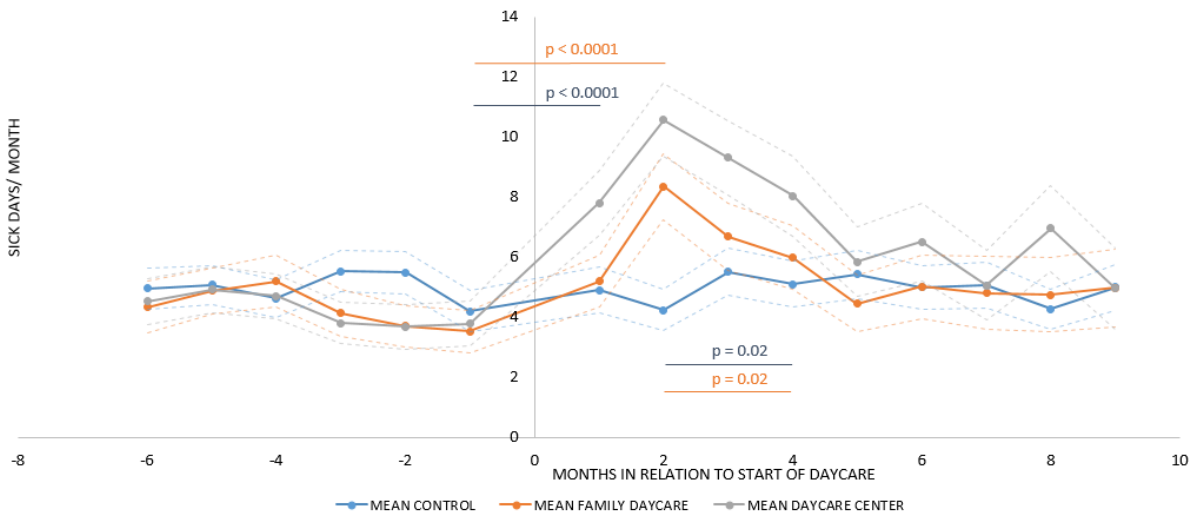

Figure 2

Peer review only

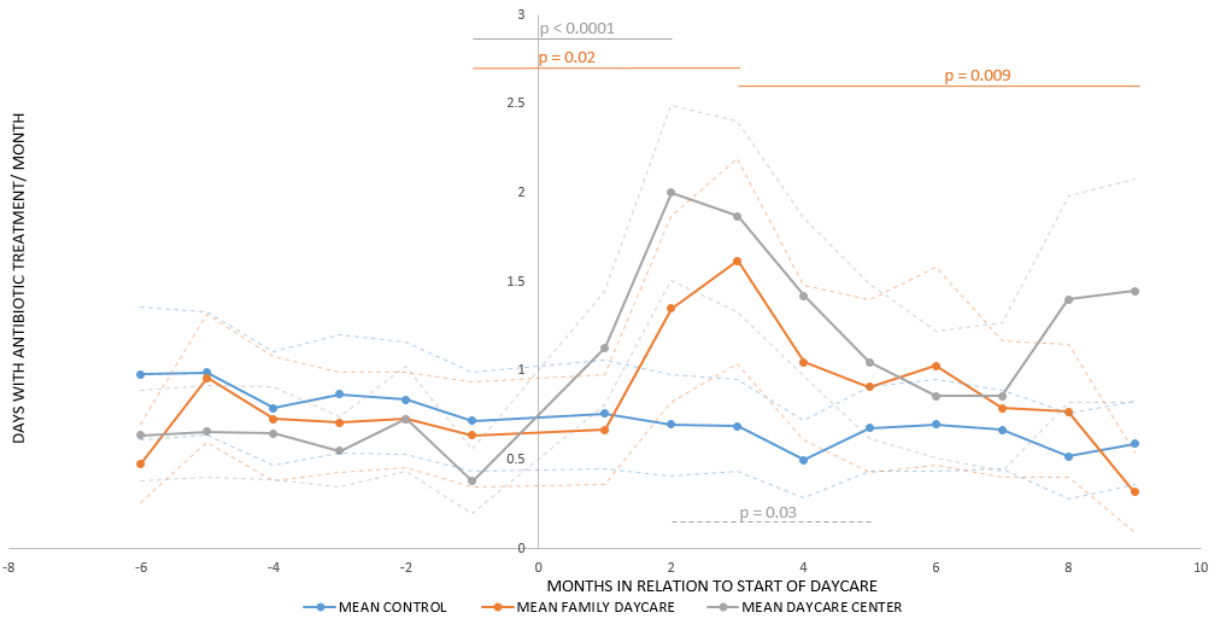

Figure 3

1  
2  
3  
4  
5  
6  
7  
8  
9  
10  
11  
12  
13  
14  
15  
16  
17  
18  
19  
20  
21  
22  
23  
24  
25  
26  
27  
28  
29  
30  
31  
32  
33  
34  
35  
36  
37  
38  
39  
40  
41  
42  
43  
44  
45  
46  
47  
48  
49  
50  
51  
52  
53  
54  
55  
56  
57  
58  
59  
60

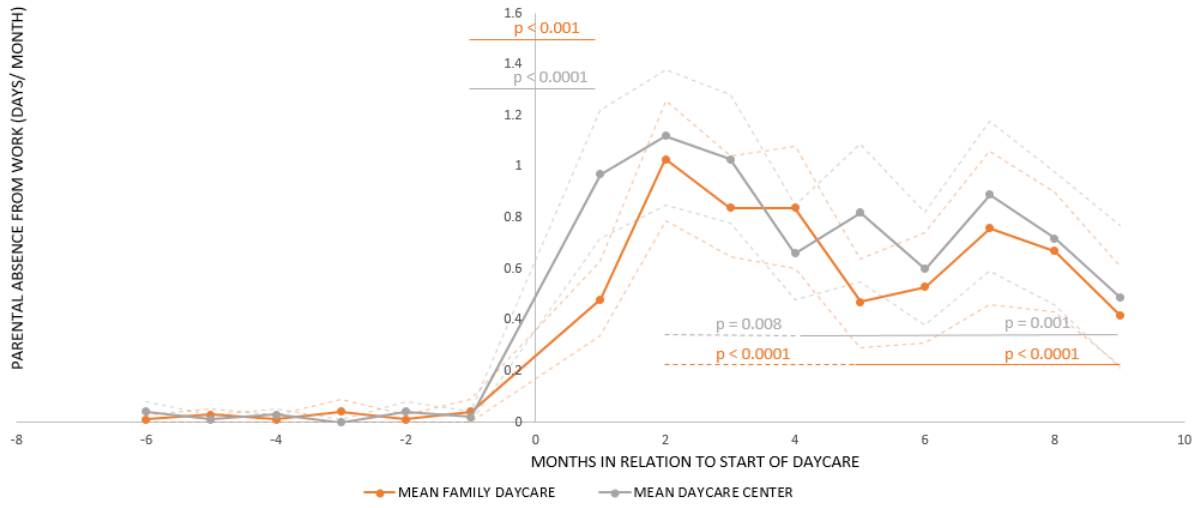

Figure 4

Peer review only



Supplemental material: figures S1 and S2.

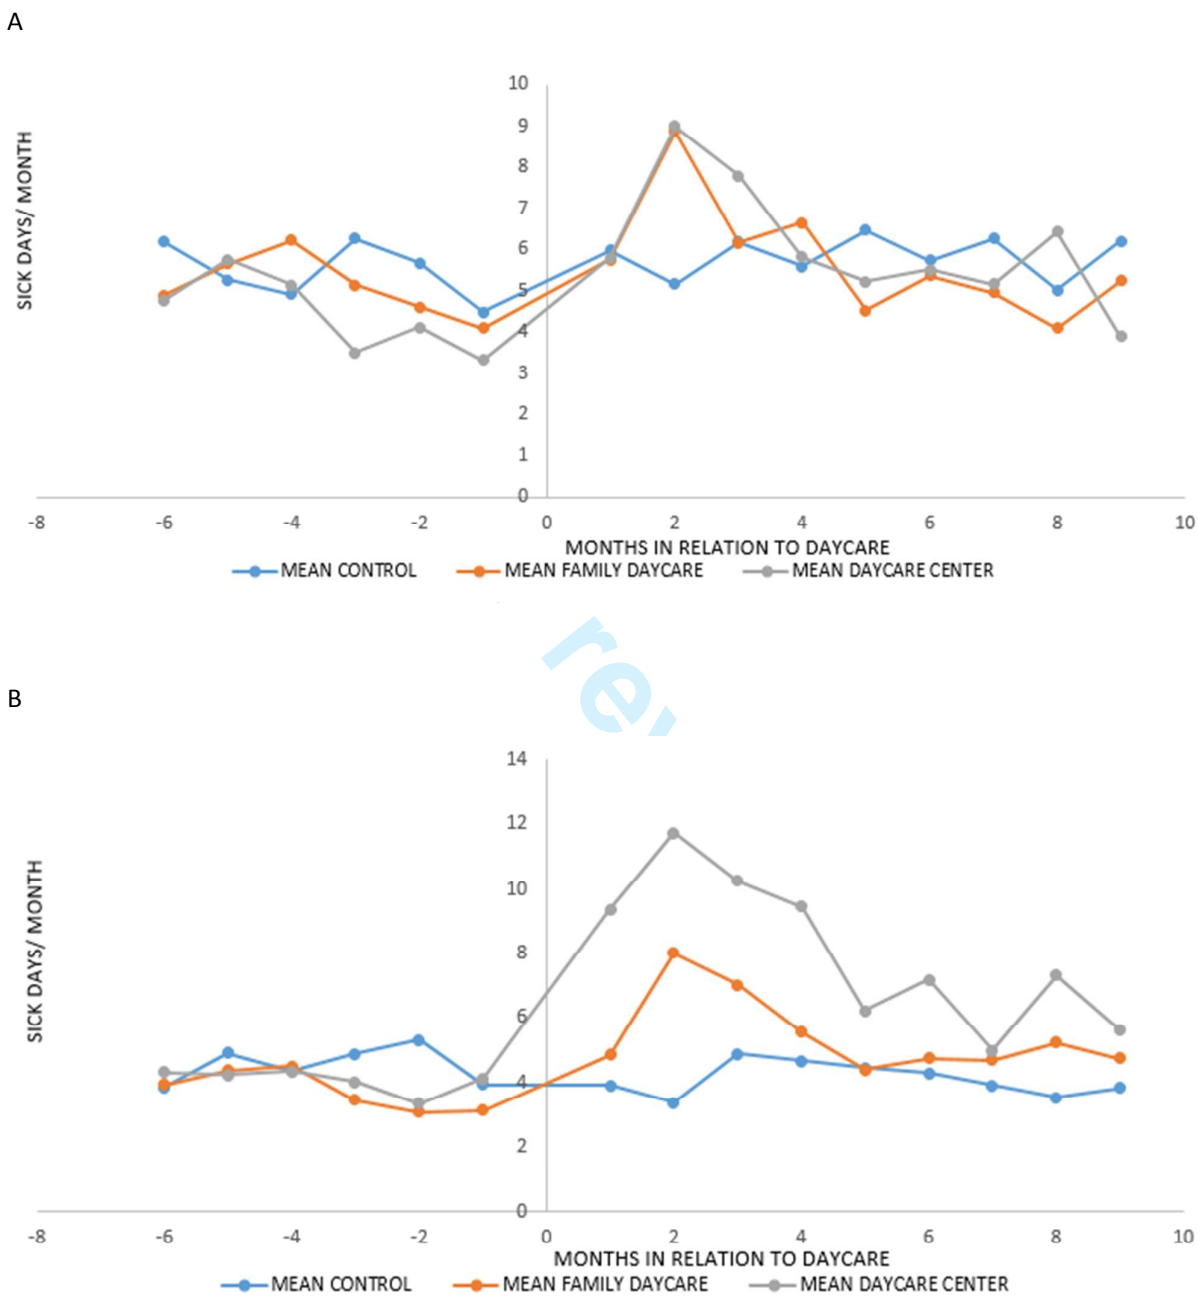

**Figure S1.** Mean sick days per month according to daycare groups in relation to start of daycare. Negative months denote the period prior to start of daycare. Data are shown for children with older siblings (A) and for children without older siblings (B).

A

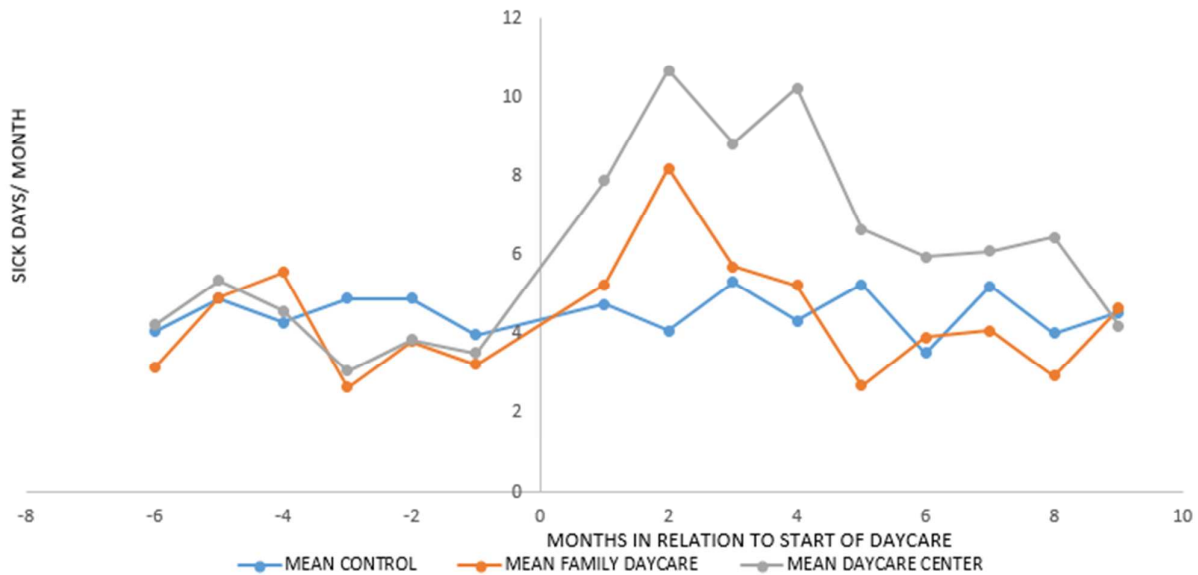

B

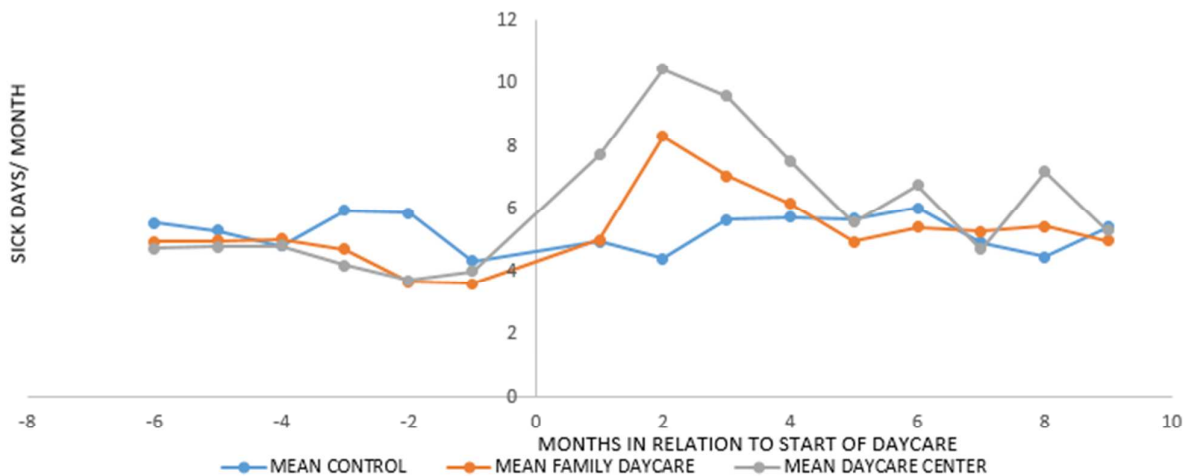

**Figure S2.** Mean sick days per month according to daycare groups in relation to start of daycare. Negative months denote the period prior to start of daycare. Data are shown for children of mothers with lower (A) and higher (B) post-secondary education.

# BMJ Open

## Daycare attendance and respiratory tract infections: a prospective birth cohort study

|                                 |                                                                                                                                                                                                                                                                                                                                                                                                                                                                                                                                                                                                                                                                                                                                                         |
|---------------------------------|---------------------------------------------------------------------------------------------------------------------------------------------------------------------------------------------------------------------------------------------------------------------------------------------------------------------------------------------------------------------------------------------------------------------------------------------------------------------------------------------------------------------------------------------------------------------------------------------------------------------------------------------------------------------------------------------------------------------------------------------------------|
| Journal:                        | <i>BMJ Open</i>                                                                                                                                                                                                                                                                                                                                                                                                                                                                                                                                                                                                                                                                                                                                         |
| Manuscript ID                   | bmjopen-2016-014635.R1                                                                                                                                                                                                                                                                                                                                                                                                                                                                                                                                                                                                                                                                                                                                  |
| Article Type:                   | Research                                                                                                                                                                                                                                                                                                                                                                                                                                                                                                                                                                                                                                                                                                                                                |
| Date Submitted by the Author:   | 06-May-2017                                                                                                                                                                                                                                                                                                                                                                                                                                                                                                                                                                                                                                                                                                                                             |
| Complete List of Authors:       | Schuez-Havupalo, Linnea; Turku University Hospital, Department of Paediatrics and Adolescent Medicine; Turun Yliopisto, Turku Institute for Child and Youth Research<br>Toivonen, Laura; Turku University Hospital, Department of Paediatrics and Adolescent Medicine; Turun Yliopisto, Turku Institute for Child and Youth Research<br>Karppinen, Sinikka; Turku University Hospital, Department of Paediatrics and Adolescent Medicine; Turun Yliopisto, Turku Institute for Child and Youth Research<br>Kaljonen, Anne; Turun Yliopisto, Turku Institute for Child and Youth Research<br>Peltola, Ville; Turku University Hospital, Department of Paediatrics and Adolescent Medicine; Turun Yliopisto, Turku Institute for Child and Youth Research |
| <b>Primary Subject Heading</b>: | Paediatrics                                                                                                                                                                                                                                                                                                                                                                                                                                                                                                                                                                                                                                                                                                                                             |
| Secondary Subject Heading:      | Infectious diseases                                                                                                                                                                                                                                                                                                                                                                                                                                                                                                                                                                                                                                                                                                                                     |
| Keywords:                       | Respiratory infections < THORACIC MEDICINE, Paediatric infectious disease & immunisation < PAEDIATRICALS, Community child health < PAEDIATRICALS                                                                                                                                                                                                                                                                                                                                                                                                                                                                                                                                                                                                        |
|                                 |                                                                                                                                                                                                                                                                                                                                                                                                                                                                                                                                                                                                                                                                                                                                                         |

SCHOLARONE™  
Manuscripts

1  
2  
3 Manuscript ID bmjopen-2016-014635, revision 1  
4

5  
6 **Daycare attendance and respiratory tract infections: a**  
7  
8  
9 **prospective birth cohort study**  
10

11 Linnea Schuez-Havupalo, MD,<sup>1,2</sup> Laura Toivonen, MD,<sup>1,2</sup> Sinikka Karppinen, MD,<sup>1,2</sup> Anne  
12 Kaljonen, BSc,<sup>2</sup> and Ville Peltola, MD, PhD<sup>1,2</sup>  
13  
14  
15  
16

17  
18 **Affiliations:** <sup>1</sup>Department of Paediatrics and Adolescent Medicine, Turku University  
19 Hospital; and <sup>2</sup>Turku Institute for Child and Youth Research, University of Turku, Turku,  
20  
21 Finland  
22  
23  
24

25  
26  
27 **Correspondence to:** Ville Peltola, MD, PhD, Department of Paediatrics and Adolescent  
28 Medicine, Turku University Hospital, 20521 Turku, Finland; ville.peltola@utu.fi; tel. +358-  
29  
30 2-3130000; fax: +358-2-3131460.  
31  
32  
33

34  
35  
36 **Keywords:** daycare, respiratory infections, children, the STEPS Study  
37  
38  
39

40 **Word count:** 2951  
41  
42  
43  
44  
45  
46  
47  
48  
49  
50  
51  
52  
53  
54  
55  
56  
57  
58  
59  
60

## Abstract

**Objective.** We explored the burden of respiratory tract infections in young children with regard to daycare initiation.

**Design.** Longitudinal prospective birth cohort study.

**Setting and method.** We recruited 1827 children for follow-up until the age of 24 months collecting diary data on respiratory tract infections and daycare. Children with continuous daycare type and complete data were divided into groups of centre-based daycare (n=299), family daycare (n=245), and home care (n=350). Using repeated measures variance analyses, we analysed days per month with symptoms of respiratory tract infection, antibiotic treatments, and parental absence from work for a period of 6 months prior to and 9 months after the start of daycare.

**Results.** We documented a significant effect of time and type of daycare, as well as a significant interaction between them for all outcome measures. There was a rise in mean days with symptoms from 3.79 (95% CI 3.04-4.53) during the month preceding centre-based daycare to 10.57 (95% CI 9.35-11.79) at 2 months after the start of centre-based daycare, with a subsequent decrease within the following 9 months. Similar patterns with a rise and decline were observed in the use of antibiotics and parental absences. The start of family daycare had weaker effects. Our findings were not changed when taking into account confounding factors.

**Conclusions.** Our study shows the rapid increase in respiratory infections after start of daycare and a relatively fast decline in the course of time with continued daycare. It is important to support families around the beginning of daycare.

## Article summary

### Strength and limitations of this study

- We prospectively collected detailed day-to-day diary data on respiratory tract infections and related outcomes from 0 to 2 years of age in a birth cohort population, and documented daycare type and starting date.
- The study design allowed us to analyze the time-dependent effects of centre-based daycare and family daycare on the days per month with symptoms of a respiratory infection in comparison with children of same age in home care.
- Different confounders were taken into account, but they did not change our findings of a peak in the rate of respiratory tract infections shortly after daycare initiation, and a clear decline thereafter.
- A limitation is that, due to strict requirements regarding detail in follow up, we lost a substantial proportion of cases.

## Introduction

Daycare has been known to be a major risk factor for respiratory tract infections (RTIs) in children for over 30 years.[1-4] A considerable proportion of children in modern society attend daycare from the age of less than two years. RTIs in this age group constitute an important health problem. In addition to causing stress to children and families, they also affect transmission of pathogens to other age groups, parental absences from work with ensuing economic consequences, and rates of anti-microbial medication use with subsequent impact on resistance patterns.[5-7]

Within the daycare setting, factors reflecting contact rates with other children have consistently been identified as important determinants of infection risk. These factors include group sizes, or size and type of the daycare facility,[8-12] as well as weekly exposure time.[13] A number of studies have shown children of young age to be particularly vulnerable to daycare-related effects regarding transmission of respiratory virus infections,[8, 13-17] and early daycare has also been linked to more severe or long-term health problems, such as recurrent acute otitis media (AOM), high numbers of antibiotic medications during early childhood, an increased lifetime risk of asthma, and an increased risk of invasive pneumococcal infections.[18-20] In their cross-sectional study, Hurwitz et al. were the first to specifically demonstrate a lower daycare-attributable risk of RTIs with increased time after daycare initiation, and thus provided data to suggest that daycare-related infection risks were not exclusively linked to the absolute age of a child.[17] A large register-based study assessing RTI-related hospitalizations in under-school aged children confirmed a decrease of hospitalizations with an increased time in daycare of over 6 months.[14] Only a few larger-size longitudinal studies have assessed the effects of overall exposure time to daycare in relation to RTIs,[15, 16, 21] and lose frequency of follow-up has limited the conclusions of

1  
2  
3 chronological variations. Some studies have found a protective effect of starting daycare  
4  
5 early with regard to RTIs later in life.[16, 21]  
6

7  
8 Given the discrepancy between potential risks and benefits of early daycare in  
9  
10 children under the age of 2 years, detailed longitudinal studies assessing the burden of disease  
11  
12 as a function of time before and after the start of daycare are needed. Families, child health  
13  
14 care professionals, and daycare providers would benefit from more detailed knowledge about  
15  
16 the daycare-related impact of RTIs on this vulnerable age-group over time. We examined our  
17  
18 hypothesis of a time-limited effect of daycare on RTIs in a prospectively followed birth  
19  
20 cohort.  
21

## 22 23 24 25 **Methods**

### 26 27 **Study population and conduct**

28  
29 We used the cohort of the observational 'Steps to the Healthy Development and Well-being  
30  
31 of Children' Study (The STEPS Study), which consists of 1827 children from 1797  
32  
33 families.[22] Recruitment occurred in two stages from women with a live birth between 1  
34  
35 January 2008 and 31 March 2010 in the Southwest Finland Hospital District (n=9936).  
36  
37

38  
39 During the first stage, 1387 families were recruited through community midwifery services  
40  
41 during pregnancy, and a further 410 families joined the study soon after the birth of their  
42  
43 child. In this study, follow-up included an age frame of 0-2 years, until March 2012. We  
44  
45 collected questionnaire-based data on family related factors and daycare arrangements at  
46  
47 gestational week 20, and at ages 13 months, 18 months, and 24 months, as applicable.  
48

49  
50 Families kept study diaries that recorded health related factors, the precise starting date of  
51  
52 daycare, and data from physician visits. Parents documented the child's symptoms, antibiotic  
53  
54 treatments, and parental absence from work on a day-to-day basis in these diaries. Parents  
55  
56  
57  
58  
59  
60



1  
2  
3 were instructed to also mark symptom-free days in the diary. We differentiated missing from  
4  
5 negative data by excluding follow-up with no diary markings.  
6

7 Families attended our nurse-led study clinic when the child was 2 and 13 months of  
8  
9 age. During RTIs part of the cohort (n=982) were also followed up by our physician-led study  
10  
11 clinic.[23] Recruitment of children to our study is shown in figure 1. Exclusion criteria for  
12  
13 this study constituted discontinued follow-up before daycare initiation, insufficient  
14  
15 information on daycare arrangements, or a lack of information on home care. The Ethics  
16  
17 Committee of the Hospital District of Southwest Finland approved the study protocol. The  
18  
19 parents of the participating children gave their written, informed consent.  
20  
21  
22  
23  
24

### 25 **Daycare attendance**

26  
27 Children were categorized into three different groups according to daycare arrangements:  
28  
29 children cared for by parents or relatives (home care group), children attending family  
30  
31 daycare (FDC), and children attending daycare centres (DCC). In this study family daycare  
32  
33 was defined as daycare provided by a trained carer in her or his home, or in the children's  
34  
35 homes using a rotational system. According to local regulations, FDC group sizes included  
36  
37 no more than 5 children. In rare cases, carers worked together forming a common nursery.  
38  
39 Since group sizes tended to be relatively small in those nurseries, these children were  
40  
41 included in the FDC group. Daycare centres were defined by larger-group, centre-based care  
42  
43 provided by several professional carers. FDC and care in DCCs were provided either by the  
44  
45 municipality or on a private basis.  
46  
47  
48  
49  
50

### 51 **Outcomes**

52  
53 The outcomes of the study were symptoms of RTIs (cough, rhinorrhea, fever, or wheeze),  
54  
55 consumption of antibiotic medication, and parental absence from work as recorded on a day-  
56  
57  
58  
59  
60

1  
2  
3 to-day basis in the study diaries. Antibiotic medications prescribed for any reason were  
4 included, but the main indication was AOM. Any parental absence from work due to the  
5 child's illness was recorded, and reasons were not limited to RTIs. Final outcome measures  
6 constituted days per month with RTI symptoms (sick days), antibiotic medication, and  
7 parental absence from work.  
8  
9  
10  
11  
12

### 13 14 15 16 **Confounding factors**

17 The following potential confounders were taken into consideration: sex, siblings, season of  
18 year at start of daycare, asthma in the parents, pets (cats or dogs at home), maternal post-  
19 secondary education, and family monthly net income.[24-26] There was only a small  
20 proportion of families with known smoking in either one of the parents (127 within the home  
21 care, FDC and DCC groups), and since our results indicated reporting bias, this variable was  
22 excluded from the analyses.  
23  
24  
25  
26  
27  
28  
29  
30  
31  
32  
33

### 34 **Statistical analysis**

35 All statistical analyses were carried out using SAS version 9.4 (SAS, Cary, NC, USA). In all  
36 our analyses P-values less than 0.05 were regarded as statistically significant. In the first step,  
37 outcome variables were calculated as days per month for each child and aligned in a time  
38 sequence relating to the beginning of daycare. Follow-up included a time of 6 months  
39 previous to and 9 months after the beginning of daycare. Since children commenced daycare  
40 at different ages, this meant that not all data of individual follow-up related to the fixed age  
41 frame of 0-2 years. Data from outside this age range were excluded from the analysis using  
42 the SAS MIXED procedure. For the home care group the equivalent age range of follow-up  
43 was calculated using the mean age of starting daycare in the FDC and DCC groups (mean  
44  
45  
46  
47  
48  
49  
50  
51  
52  
53  
54  
55  
56  
57  
58  
59  
60

1  
2  
3 starting age at 15 months), and resulted in a follow-up period from 9 to 24 months (6 months  
4 prior to and 9 months after the mean start of daycare at 15 months).  
5  
6

7 If a child finished daycare during follow-up for any reason, data after discontinuation  
8 of daycare were selectively excluded by the SAS MIXED procedure.  
9

10 After comparisons using independent sample t-tests and variance analyses, data were  
11 analyzed by repeated measures variance analysis comparing all three groups for type of  
12 daycare and time, as well as their interaction. In a second step, we compared the difference of  
13 least square means between all pairs of analyzed months and determined the shortest time  
14 intervals during which statistically significant differences in our outcome measures could be  
15 observed. The shortest time for a rise of outcome measures was determined from the last  
16 month prior to starting daycare and for a decline from the peak of each outcome variable.  
17 Although the distributions of monthly outcome variables (sick days, days with antibiotic  
18 treatment, and parental absence from work) were skewed in our analyses (coefficient of  
19 skewness up to 2.4 and kurtosis 7.6), the pairwise difference variables followed  
20 approximately a normal distribution.  
21  
22  
23  
24  
25  
26  
27  
28  
29  
30  
31  
32  
33  
34  
35

36 In a third step, repeated measures variance analysis was repeated according to the  
37 previous model, but stratifying according to individual confounding factors.  
38  
39

40 Sensitivity testing was performed by additional variance analyses excluding all data  
41 from children who finished daycare during follow-up.  
42  
43  
44  
45  
46

## 47 **Results**

48 Figure 1 shows numbers of children within follow-up. Within our cohort of 1570 children in  
49 active follow-up, 276 (21.8%) of 1264 children with data on daycare arrangements at age 13  
50 months attended daycare (11.7% in DCC, 10.1% in FDC) and 593 (55.0%) of 1079 children  
51 attended daycare at the age of 24 months (29.5% in DCC and 25.0 % in FDC). At all ages the  
52  
53  
54  
55  
56  
57  
58  
59  
60

1  
2  
3 vast majority of children in daycare spent over 5 hours per day at daycare (88.5% at age 13  
4 months and 91.6% at age 24 months). Group sizes were clearly smaller for children attending  
5 FDC as compared to DCC, with 88.3% (at 13 months) to 82.7% (at 24 months) of families  
6 reporting a group size of less than 5 children per group. In DCC group sizes were variable  
7 with the following results for the ages of 13 months (and 24 months): less than 5 children for  
8 2.0%, 5-15 children for 86.8%, over 15 children for 11.1% (less than 5 children for 1.4%, 5-  
9 15 children for 87.8%, over 15 children for 10.9%).

10  
11  
12  
13  
14  
15  
16  
17  
18  
19  
20  
21  
22  
23  
24  
25  
26  
27  
28  
29  
30  
31  
32  
33  
34  
35  
36  
37  
38  
39  
40  
41  
42  
43  
44  
45  
46  
47  
48  
49  
50  
51  
52  
53  
54  
55  
56  
57  
58  
59  
60

Missing knowledge regarding the exact time of start of daycare, or earlier discontinuation of the study, led to a drop-out of a large part of cases, but these drop-outs occurred mostly before the start of daycare (figure 1). Baseline characteristics and mean (SD) values of outcome measures of children included in the analysis are shown in table 1. Mean age at the beginning of daycare was 15 months (SD 4.1). Start of daycare (FDC or DCC) occurred in 38.2% of cases during fall-winter (October to March) and in 61.8% during spring-summer (April to September). Over the whole follow-up period during daycare, children in DCC had only slightly more sick days per month (mean 5.54, SD 4.07) compared to children in FDC (mean 4.85, SD 3.49) or home care (mean 4.80, SD 3.39). There was no significant difference in days with antibiotic treatment. Parental absences from work could not be compared to the home care group, since the stay-at-home parent was not employed, and could therefore not be absent from work. Discontinuous daycare was observed in only a minority of children (11 children in FDC and 13 children in DCC). The results remained consistent in analyses performed without data from children who finished daycare during follow-up.

**Table 1.** Comparisons of baseline variables and outcome measures according to daycare type

|                                                            | Type of daycare     |                          |                          | P     |
|------------------------------------------------------------|---------------------|--------------------------|--------------------------|-------|
|                                                            | Home care (n = 350) | Family daycare (n = 245) | Daycare centre (n = 299) |       |
| Age at the beginning of daycare, mean (SD)                 | NA                  | 1.24 (0.37)              | 1.28 (0.35)              | 0.25* |
| Sex                                                        |                     |                          |                          |       |
| Males, number (%)                                          | 172 (49.1%)         | 124 (50.6%)              | 162 (54.1%)              | 0.4†  |
| Born preterm (<37 gestational weeks), number (%)           | 18 (5.0%)           | 7 (2.9%)                 | 14 (4.7%)                | 0.38† |
| Sick days per month, mean (SD)                             | 4.80 (3.39)         | 4.85 (3.49)              | 5.54 (4.07)              | 0.03‡ |
| Days with antibiotic treatment per month, mean (SD)        | 0.74 (1.41)         | 0.82 (1.36)              | 0.93 (1.14)              | 0.21‡ |
| Days with parental absences from work per month, mean (SD) | NA                  | 0.31 (0.38)              | 0.36 (0.45)              | 0.17* |

NA, not applicable.

\*Independent sample t-test

†Chi-square test

‡Unadjusted variance analysis

1  
2  
3 There was a peak of mean sick days per month at 2 months after the start of daycare  
4 for both FDC and DCC (figure 2). The rise in sick days was stronger for the DCC group than  
5 for the FDC group. We observed increases from 3.53 mean sick days (95% CI 2.83-4.24)  
6 during the month prior to the start of daycare to 8.34 mean sick days per month (95% CI  
7 7.25-9.43) for the FDC group, and from 3.79 (95% CI 3.04-4.53) mean sick days prior to the  
8 start of daycare to 10.57 (95% CI 9.35-11.79) mean sick days per month for the DCC group.  
9 For both of these groups, the rise of outcome measures was a transient phenomenon; sick  
10 days were comparable to the home care group at 5 months after the start of daycare.  
11 Antibiotic use (figure 3) and parental absences from work because of children's illnesses  
12 (figure 4) rose and declined according to a pattern similar to that observed in sick days in  
13 relation to the start of daycare, although this decline was less pronounced compared to sick  
14 days.  
15

16  
17  
18  
19  
20  
21 The rise in sick days (figure 2) and antibiotic use (figure 3) was more rapid among  
22 children starting DCC than in those starting FDC. Within the home care group there were no  
23 significant findings in pairwise comparisons between months.  
24  
25

26  
27  
28  
29  
30  
31  
32  
33  
34  
35  
36  
37  
38  
39  
40  
41  
42  
43  
44  
45  
46  
47  
48  
49  
50  
51  
52  
53  
54  
55  
56  
57  
58  
59  
60  
61  
62  
63  
64  
65  
66  
67  
68  
69  
70  
71  
72  
73  
74  
75  
76  
77  
78  
79  
80  
81  
82  
83  
84  
85  
86  
87  
88  
89  
90  
91  
92  
93  
94  
95  
96  
97  
98  
99  
100  
101  
102  
103  
104  
105  
106  
107  
108  
109  
110  
111  
112  
113  
114  
115  
116  
117  
118  
119  
120  
121  
122  
123  
124  
125  
126  
127  
128  
129  
130  
131  
132  
133  
134  
135  
136  
137  
138  
139  
140  
141  
142  
143  
144  
145  
146  
147  
148  
149  
150  
151  
152  
153  
154  
155  
156  
157  
158  
159  
160  
161  
162  
163  
164  
165  
166  
167  
168  
169  
170  
171  
172  
173  
174  
175  
176  
177  
178  
179  
180  
181  
182  
183  
184  
185  
186  
187  
188  
189  
190  
191  
192  
193  
194  
195  
196  
197  
198  
199  
200  
201  
202  
203  
204  
205  
206  
207  
208  
209  
210  
211  
212  
213  
214  
215  
216  
217  
218  
219  
220  
221  
222  
223  
224  
225  
226  
227  
228  
229  
230  
231  
232  
233  
234  
235  
236  
237  
238  
239  
240  
241  
242  
243  
244  
245  
246  
247  
248  
249  
250  
251  
252  
253  
254  
255  
256  
257  
258  
259  
260  
261  
262  
263  
264  
265  
266  
267  
268  
269  
270  
271  
272  
273  
274  
275  
276  
277  
278  
279  
280  
281  
282  
283  
284  
285  
286  
287  
288  
289  
290  
291  
292  
293  
294  
295  
296  
297  
298  
299  
300  
301  
302  
303  
304  
305  
306  
307  
308  
309  
310  
311  
312  
313  
314  
315  
316  
317  
318  
319  
320  
321  
322  
323  
324  
325  
326  
327  
328  
329  
330  
331  
332  
333  
334  
335  
336  
337  
338  
339  
340  
341  
342  
343  
344  
345  
346  
347  
348  
349  
350  
351  
352  
353  
354  
355  
356  
357  
358  
359  
360  
361  
362  
363  
364  
365  
366  
367  
368  
369  
370  
371  
372  
373  
374  
375  
376  
377  
378  
379  
380  
381  
382  
383  
384  
385  
386  
387  
388  
389  
390  
391  
392  
393  
394  
395  
396  
397  
398  
399  
400  
401  
402  
403  
404  
405  
406  
407  
408  
409  
410  
411  
412  
413  
414  
415  
416  
417  
418  
419  
420  
421  
422  
423  
424  
425  
426  
427  
428  
429  
430  
431  
432  
433  
434  
435  
436  
437  
438  
439  
440  
441  
442  
443  
444  
445  
446  
447  
448  
449  
450  
451  
452  
453  
454  
455  
456  
457  
458  
459  
460  
461  
462  
463  
464  
465  
466  
467  
468  
469  
470  
471  
472  
473  
474  
475  
476  
477  
478  
479  
480  
481  
482  
483  
484  
485  
486  
487  
488  
489  
490  
491  
492  
493  
494  
495  
496  
497  
498  
499  
500  
501  
502  
503  
504  
505  
506  
507  
508  
509  
510  
511  
512  
513  
514  
515  
516  
517  
518  
519  
520  
521  
522  
523  
524  
525  
526  
527  
528  
529  
530  
531  
532  
533  
534  
535  
536  
537  
538  
539  
540  
541  
542  
543  
544  
545  
546  
547  
548  
549  
550  
551  
552  
553  
554  
555  
556  
557  
558  
559  
560  
561  
562  
563  
564  
565  
566  
567  
568  
569  
570  
571  
572  
573  
574  
575  
576  
577  
578  
579  
580  
581  
582  
583  
584  
585  
586  
587  
588  
589  
590  
591  
592  
593  
594  
595  
596  
597  
598  
599  
600  
601  
602  
603  
604  
605  
606  
607  
608  
609  
610  
611  
612  
613  
614  
615  
616  
617  
618  
619  
620  
621  
622  
623  
624  
625  
626  
627  
628  
629  
630  
631  
632  
633  
634  
635  
636  
637  
638  
639  
640  
641  
642  
643  
644  
645  
646  
647  
648  
649  
650  
651  
652  
653  
654  
655  
656  
657  
658  
659  
660  
661  
662  
663  
664  
665  
666  
667  
668  
669  
670  
671  
672  
673  
674  
675  
676  
677  
678  
679  
680  
681  
682  
683  
684  
685  
686  
687  
688  
689  
690  
691  
692  
693  
694  
695  
696  
697  
698  
699  
700  
701  
702  
703  
704  
705  
706  
707  
708  
709  
710  
711  
712  
713  
714  
715  
716  
717  
718  
719  
720  
721  
722  
723  
724  
725  
726  
727  
728  
729  
730  
731  
732  
733  
734  
735  
736  
737  
738  
739  
740  
741  
742  
743  
744  
745  
746  
747  
748  
749  
750  
751  
752  
753  
754  
755  
756  
757  
758  
759  
760  
761  
762  
763  
764  
765  
766  
767  
768  
769  
770  
771  
772  
773  
774  
775  
776  
777  
778  
779  
780  
781  
782  
783  
784  
785  
786  
787  
788  
789  
790  
791  
792  
793  
794  
795  
796  
797  
798  
799  
800  
801  
802  
803  
804  
805  
806  
807  
808  
809  
810  
811  
812  
813  
814  
815  
816  
817  
818  
819  
820  
821  
822  
823  
824  
825  
826  
827  
828  
829  
830  
831  
832  
833  
834  
835  
836  
837  
838  
839  
840  
841  
842  
843  
844  
845  
846  
847  
848  
849  
850  
851  
852  
853  
854  
855  
856  
857  
858  
859  
860  
861  
862  
863  
864  
865  
866  
867  
868  
869  
870  
871  
872  
873  
874  
875  
876  
877  
878  
879  
880  
881  
882  
883  
884  
885  
886  
887  
888  
889  
890  
891  
892  
893  
894  
895  
896  
897  
898  
899  
900  
901  
902  
903  
904  
905  
906  
907  
908  
909  
910  
911  
912  
913  
914  
915  
916  
917  
918  
919  
920  
921  
922  
923  
924  
925  
926  
927  
928  
929  
930  
931  
932  
933  
934  
935  
936  
937  
938  
939  
940  
941  
942  
943  
944  
945  
946  
947  
948  
949  
950  
951  
952  
953  
954  
955  
956  
957  
958  
959  
960  
961  
962  
963  
964  
965  
966  
967  
968  
969  
970  
971  
972  
973  
974  
975  
976  
977  
978  
979  
980  
981  
982  
983  
984  
985  
986  
987  
988  
989  
990  
991  
992  
993  
994  
995  
996  
997  
998  
999  
1000

In repeated measures variance analyses there was a significant overall effect for time and type of daycare and their interaction for all outcome measures. This interaction showed the above described pattern of rise and decline, which was strongest for the DCC group and weaker for the FDC group. Within the home care group there was no such pattern, but variation was observed in the frequency of sick days per month over time. When analyzing sick days and antibiotic use between different types of daycare without the aspect of time, levels of these outcome measures were higher in the DCC group in comparison to the home care group ( $P < 0.001$  for both measures) and FDC group ( $P < 0.001$  and  $P = 0.04$ , respectively). There were no significant differences between the FDC and home care group.

1  
2  
3 The presence of older siblings in the family, higher post-secondary education in  
4 mothers, and higher family income were all associated with a higher burden of disease (table  
5  
6  
7 2).  
8  
9  
10  
11  
12  
13  
14  
15  
16  
17  
18  
19  
20  
21  
22  
23  
24  
25  
26  
27  
28  
29  
30  
31  
32  
33  
34  
35  
36  
37  
38  
39  
40  
41  
42  
43  
44  
45  
46  
47  
48  
49  
50  
51  
52  
53  
54  
55  
56  
57  
58  
59  
60

For peer review only

**Table 2.** Effects of confounding factors on the rates of RTI symptoms (sick days) according to daycare type

|                                                     | Type of daycare |                                |                 |                                |                 |                                | P*    | P for interaction with mode of daycare |
|-----------------------------------------------------|-----------------|--------------------------------|-----------------|--------------------------------|-----------------|--------------------------------|-------|----------------------------------------|
|                                                     | Home care       |                                | Family daycare  |                                | Daycare centre  |                                |       |                                        |
|                                                     | n/N (%)         | Sick days per month, mean (SD) | n/N (%)         | Sick days per month, mean (SD) | n/N (%)         | Sick days per month, mean (SD) |       |                                        |
| Older siblings                                      |                 |                                |                 |                                |                 |                                | 0.02  | <0.001                                 |
| Yes                                                 | 162/ 350 (46.3) | 5.55 (3.72)                    | 99 /245 (40.4)  | 5.26 (3.33)                    | 132/ 299 (44.1) | 5.10 (3.72)                    |       |                                        |
| No                                                  | 188/ 350 (53.7) | 4.16 (2.95)                    | 146/ 245 (59.6) | 4.58 (3.59)                    | 167/ 299 (55.9) | 5.88 (4.31)                    |       |                                        |
| Higher post-secondary education in mother           |                 |                                |                 |                                |                 |                                | 0.009 | 0.27                                   |
| Yes                                                 | 211/ 341 (61.9) | 5.12 (3.53)                    | 161/ 239 (67.4) | 5.12 (3.72)                    | 203/ 293 (69.3) | 5.66 (3.75)                    |       |                                        |
| No                                                  | 130/ 341 (38.1) | 4.40 (3.17)                    | 78 / 239 (32.6) | 4.23 (2.97)                    | 90/ 293 (30.7)  | 5.45 (4.79)                    |       |                                        |
| Family net income under 2000 euros per month        |                 |                                |                 |                                |                 |                                | 0.005 | 0.37                                   |
| Yes                                                 | 83/ 343 (24.2)  | 4.15 (3.28)                    | 33/ 239 (13.8)  | 3.43 (2.75)                    | 56/ 294 (19.0)  | 5.29 (3.39)                    |       |                                        |
| No                                                  | 260/343 (75.8)  | 5.03 (3.43)                    | 206/ 239 (86.1) | 5.04 (3.57)                    | 238/ 294 (81.0) | 5.64 (4.23)                    |       |                                        |
| Start of daycare during fall-winter (October-March) |                 |                                |                 |                                |                 |                                | 0.39  | 0.61                                   |
| Yes                                                 | NA              | NA                             | 100/ 245 (40.8) | 4.90 (3.15)                    | 108/ 299 (36.1) | 5.69 (4.21)                    |       |                                        |
| No                                                  | NA              | NA                             | 145/ 245 (59.2) | 4.82 (3.73)                    | 191/ 299 (63.9) | 5.45 (4.0)                     |       |                                        |
| Asthma in parents                                   |                 |                                |                 |                                |                 |                                | 0.95  | 0.72                                   |
| Yes                                                 | 35/ 340 (10.3)  | 4.65 (3.26)                    | 26/ 234 (11.1)  | 5.54 (4.0)                     | 30/ 287 (10.5)  | 5.83 (4.25)                    |       |                                        |
| No                                                  | 305/ 340 (89.7) | 4.86 (3.43)                    | 208/ 234 (88.9) | 4.76 (3.45)                    | 257/ 287 (89.5) | 5.56 (4.08)                    |       |                                        |
| Cat or dog at home                                  |                 |                                |                 |                                |                 |                                | 0.31  | 0.23                                   |
| Yes                                                 | 94/ 295 (31.9)  | 4.43 (3.07)                    | 80/ 196 (40.8)  | 4.83 (3.07)                    | 57/ 219 (26.0)  | 5.80 (4.28)                    |       |                                        |
| No                                                  | 201/ 295 (68.1) | 5.14 (3.48)                    | 116/ 196 (59.2) | 4.92 (3.14)                    | 162/ 219 (74.0) | 5.68 (3.66)                    |       |                                        |



1  
2  
3  
4  
5 n/N, number of children per number of those with data available; NA, not applicable; RTI, respiratory tract infection.  
6  
7

8 \*By univariate analysis, regardless of daycare type.  
9  
10  
11  
12  
13  
14  
15  
16  
17  
18  
19  
20  
21  
22  
23  
24  
25  
26  
27  
28  
29  
30  
31  
32  
33  
34  
35  
36  
37  
38  
39  
40  
41  
42  
43  
44  
45  
46  
47  
48  
49

For peer review only

1  
2  
3 In repeated measures variance analyses stratified according to confounding factors,  
4  
5 associations remained ( $P < 0.001$  for the effect of time and  $P < 0.001$  for daycare type for all  
6  
7 analyses regarding sick days, except for those with parental asthma, where  $P = 0.004$  for  
8  
9 daycare type). Online supplementary figures S1 and S2 illustrate the association of start of  
10  
11 daycare with respiratory tract infections in children stratified according to the presence of  
12  
13 siblings and maternal post-secondary education. For children without older siblings, the rise  
14  
15 of sick days per month after start of daycare was more pronounced than for those with older  
16  
17 siblings.  
18  
19

## 20 21 22 23 **Discussion**

24  
25 In this study there was a strong, but temporally limited effect of daycare initiation on the rate  
26  
27 of RTIs. This was strongest for the DCC group and weaker for the FDC group. An effect of  
28  
29 overall time in daycare,[14, 15, 17] as well as daycare type, on infections has been  
30  
31 documented in previous studies.[8, 10, 11, 13] Our study specifically focused on RTI  
32  
33 dynamics around the start of daycare.  
34  
35

36  
37 We analyzed three main outcome measures. After showing a peak, the rate of sick  
38  
39 days returned near to baseline within our 9-month follow-up period from the start of daycare;  
40  
41 for antibiotic use there was more scatter with a less pronounced decline, and parental absence  
42  
43 from work did not return to baseline, which was to be expected due to the fact that both  
44  
45 parents tend to be at work after the start of daycare. Consideration of confounders did not  
46  
47 change our findings. The effect of older siblings on infections in relation to daycare has been  
48  
49 previously described,[17] and our findings are in line with previous results. The effects of  
50  
51 virus epidemics and season of year were minimized in our study setting, but they cannot be  
52  
53 completely excluded.  
54  
55  
56  
57  
58  
59  
60

1  
2  
3 We consider the main strength of our study the detailed follow-up on a day-to-day  
4 basis for a relatively large number of cases and in chronological relation to the start of  
5 daycare. Previous cohort studies mostly assessed data from follow-up with intervals of  
6 months or longer periods and without information on the exact starting point of daycare, such  
7 that detailed chronological analyses for the time around daycare initiation could not be  
8 carried out.[13, 15, 16, 26] Retrospective collection of data relating to symptoms poses  
9 problems in some other studies, since it strongly relies on parents' memories.  
10  
11  
12  
13  
14  
15  
16  
17

18 There are some limitations to our study. Exposure to daycare was documented as  
19 hours per day only. However, irregular daycare was rare and high daily exposure can be  
20 extrapolated to high weekly or monthly exposure. Follow-up time was relatively short albeit  
21 sufficient to demonstrate the above described effects. Outcome measures were based on self-  
22 reported data and are thus subject to bias. Daily diary-keeping demanded regular participation  
23 of families, although diaries were concise and easily completed. There were several  
24 indicators that, for the small number of families with known smoking, diaries were not  
25 completed as comprehensively as in the rest of the cohort, so that we had to exclude parental  
26 smoking as a confounder from our study. The group with more detailed follow-up during  
27 infections had access to our medical services free of charge, and thus may have been more  
28 motivated to accurately document all experienced events. Inclusion into this group was  
29 offered to all families without any selection criteria.  
30  
31  
32  
33  
34  
35  
36  
37  
38  
39  
40  
41  
42  
43  
44

45 Due to strict requirements for comprehensive follow-up we lost a considerable  
46 proportion of cases. For all cases lost, missing data were collected before or at the time of  
47 daycare initiation, which means that the majority of drop-outs occurred before the critical  
48 follow-up after daycare initiation. This decreases the potential effect of exclusion-related bias  
49 on our results. In order to screen for bias, a comparison of background variables was  
50  
51  
52  
53  
54  
55  
56  
57  
58  
59  
60

1  
2  
3 performed for non-responders and responders at 13 months of age, and there were only minor  
4  
5 differences between groups.[22]  
6

7 Our cohort children had less often older siblings than all eligible children, and their  
8  
9 mothers had higher education and occupational status.[22] Otherwise our cohort represents  
10  
11 the Southwest Finnish population well. Although lower socioeconomic class has traditionally  
12  
13 been linked to an increased rate of infectious diseases,[27] a Swedish study found an  
14  
15 association between low social status, smaller likelihood to be cared for in out-of-home care,  
16  
17 and lesser consumption of medical services.[28] Within our cohort, social status, as indicated  
18  
19 by maternal education and family income, was also reflected by a higher rate of RTIs, but this  
20  
21 did not affect our findings relating to daycare.  
22  
23  
24  
25  
26

## 27 **Conclusion**

28  
29  
30 In this longitudinal cohort study, the respiratory infectious disease burden was clearly related  
31  
32 to out-of-home care, but it decreased already within a short follow-up time of 9 months after  
33  
34 the start of daycare. Our findings demonstrate a clearly limited temporal impact of daycare-  
35  
36 related RTIs in early childhood, which has implications on a correctly focused approach  
37  
38 when supporting families with small children. Families, daycare providers and pediatricians  
39  
40 may be reassured of the transient nature of increased RTIs after the start of daycare.  
41  
42  
43  
44  
45  
46  
47  
48  
49  
50  
51  
52  
53  
54  
55  
56  
57  
58  
59  
60

## Acknowledgments

We are extremely grateful to all the families who took part in this study, the midwives for their help in recruiting them, and the whole STEPS Study team, which includes our research physicians and study nurses.

## Footnotes

**Competing interests.** The authors have no competing interests.

**Funding.** All phases of this study were supported by the University of Turku; the Åbo Akademi University; the Turku University Hospital; the Academy of Finland, Grants no. 123571, 140251, and 277535; the Foundation for Pediatric Research, Finland; and Research Funds from Specified Government Transfers, Hospital District of Southwest Finland. Dr. Schuez-Havupalo was also supported by the Turku University Foundation.

**Data sharing statement:** Enquiries regarding extra data can be emailed to Ville Peltola.

**Contributors.** LSH contributed to conception and design, the clinical follow-up and data collection, carried out data analyses, drafted the initial manuscript, and approved the final manuscript as submitted. LT and SK contributed to conception and design, the clinical follow-up and data collection, reviewed and revised the manuscript, and approved the final manuscript as submitted. AK contributed to conception and design, coordinated data collection, carried out data analyses, reviewed and revised the manuscript, and approved the final manuscript as submitted. VP conceptualized and designed the study, coordinated and supervised data collection and analyses, reviewed and revised the manuscript, and approved the final manuscript as submitted.

## References

- 1 Doyle AB. Incidence of illness in early group and family day-care. *Pediatrics* 1976;58:607-13.
- 2 Strangert K. Respiratory illness in preschool children with different forms of day care. *Pediatrics* 1976;57:191-6.
- 3 Wald ER, Dashefsky B, Byers C, et al. Frequency and severity of infections in day care. *J Pediatr* 1988;112:540-6.
- 4 Fleming DW, Cochi SL, Hightower AW, et al. Childhood upper respiratory tract infections: to what degree is incidence affected by day-care attendance? *Pediatrics* 1987;79:55-60.
- 5 Nurmi T, Salminen E, Pönkä A. Infections and other illnesses of children in day-care centers in Helsinki. II: The economic losses. *Infection* 1991;19:331-5.
- 6 Holmes SJ, Morrow AL, Pickering LK. Child-care practices: effects of social change on the epidemiology of infectious diseases and antibiotic resistance. *Epidemiol Rev* 1996;18:10-28.
- 7 Thrane N, Olesen C, Mortensen J, et al. Influence of Day Care Attendance on the Use of Systemic Antibiotics in 0- to 2- Year- Old Children. *Pediatrics* 2001;107:e76.
- 8 Louhiala P, Jaakkola N, Ruotsalainen R, et al. Form of Day Care and Respiratory Infections among Finnish Children. *Am J Public Health* 1995;85:1109-1112.
- 9 Rovers MM, Zielhuis GA, Ingels K, et al. Day-care and otitis media in young children: a critical overview. *Eur J Pediatr* 1999;158:1-6.
- 10 Marx J, Osguthorpe J, Parsons G. Day care and the incidence of otitis media in young children. *Otolaryngol Head Neck Surg* 1995;112:695-9.
- 11 Hardy A, Fowler M. Child care arrangements and repeated ear infections in young children. *Am J Public Health* 1993;83:1321-1325.
- 12 Collet JP, Burtin P, Gillet J, et al. Risk of infectious diseases in children attending different types of day-care setting. Epicreche Research Group. *Respiration* 1994;61:16-9.
- 13 The National Institute of Child Health and Human Development Early Child Care Research Network. Child Care and Common Communicable Illnesses. Results From the National Institute of Child Health and Human Development Study of Early Child Care. *Arch Pediatr Adolesc Med* 2001;155:481-488.
- 14 Kamper-Jørgensen M, Wohlfahrt J, Simonsen J, et al. Population-Based Study of the Impact of Childcare Attendance on Hospitalizations for Acute Respiratory Infections. *Pediatrics* 2006;118:1439-46.
- 15 Zutavern A, Rzehak P, Brockow I, et al. Day care in relation to respiratory-tract and gastrointestinal infections in a German birth cohort study. *Acta Paediatr* 2007;96:1494-9.

1  
2  
3 16 Cote S, Petitcherc A, Raynault M-F., et al. Short- and Long-term Risk of Infections as a  
4 Function of Group Child Care Attendance. *Arch Pediatr Adolesc Med* 2010;164:1132-7.  
5

6 17 Hurwitz ES, Gunn WJ, Pinsky PF, et al. Risk of respiratory illness associated with day-  
7 care attendance: a nationwide study. *Pediatrics* 1991;87:62-9.  
8

9 18 Nafstad P, Hagen J, Øie L, et al. Day Care Centers and Respiratory Health. *Pediatrics*  
10 1999;103:753-8.  
11

12 19 de Hoog ML, Venekamp RP, van der Ent CK, et al. Impact of early daycare on healthcare  
13 resource use related to upper respiratory tract infections during childhood: prospective  
14 WHISTLER cohort study. *BMC Med* 2014;12:107.  
15

16 20 Takala AK, Jero J, Kela E, et al. Risk factors for primary invasive pneumococcal disease  
17 among children in Finland. *JAMA* 1995;273:859-64.  
18

19 21 Ball TM, Holberg CJ, Aldous MB, et al. Influence of Attendance at Day Care on the  
20 Common Cold From Birth Through 13 Years of Age. *Arch Pediatr Adolesc Med*  
21 2002;156:121-126.  
22

23 22 Lagström H, Rautava P, Kaljonen A, et al. Cohort profile: Steps to the healthy  
24 development and well-being of children (the STEPS study). *Int J Epidemiol* 2013;42:1273-  
25 84.  
26

27 23 Toivonen L, Schuez-Havupalo L, Karppinen S, et al. Rhinovirus infections in the first 2  
28 years of life. *Pediatrics* 2016;138:20161309.  
29

30 24 Hatakka K, Piirainen L, Pohjavuori S, et al. Factors associated with acute respiratory  
31 illness in day care children. *Scand J Infect Dis* 2010;42:704-11.  
32

33 25 Koopman LP, Smit HA, Heijnen ML, et al. Respiratory infections in infants: interaction of  
34 parental allergy, child care, and siblings - The PIAMA study. *Pediatrics* 2001;108:943-8.  
35

36 26 Celedon J, Litonjua A, Weiss S, et al. Day Care Attendance in the First Year of Life and  
37 Illness of the Upper and Lower Respiratory Tract in Children With a Familial History of  
38 Atopy. *Pediatrics* 1999;104:495-500.  
39

40 27 Cohen S. Social status and susceptibility to respiratory infections. *Ann N Y Acad Sci*  
41 1999;896:246-53.  
42

43 28 Hjern A, Haglund B, Rasmussen F, et al. Socio-economic differences in daycare  
44 arrangements and use of medical care and antibiotics in Swedish preschool children. *Acta*  
45 *Paediatr* 2000;89:1250-6.  
46  
47  
48  
49  
50  
51  
52  
53  
54  
55  
56  
57  
58  
59  
60

## Figure legends

**Figure 1.** Flow-diagram of the recruitment and follow-up of study children.

**Figure 2.** Means and 95% CIs (dashed lines) of sick days per month according to daycare groups in relation to start of daycare. Negative months denote the period prior to start of daycare. Horizontal lines indicate the shortest time for a significant rise (decline) from the last month prior to starting daycare (from the peak month).

**Figure 3.** Means and 95% CIs (dashed lines) of days with antibiotic treatment per month according to daycare groups in relation to start of daycare. Negative months denote the period prior to start of daycare. Horizontal lines indicate the shortest time for a significant rise (decline) from the last month prior to starting daycare (from the peak month). Dashed lines: transiently below the significance level.

**Figure 4.** Means and 95% CIs (dashed lines) of days with parental absence from work per month according to daycare groups in relation to start of daycare. Negative months denote the period prior to start of daycare. Horizontal lines indicate the shortest time for a significant rise (decline) from the last month prior to starting daycare (from the peak month). Dashed lines: transiently below the significance level.



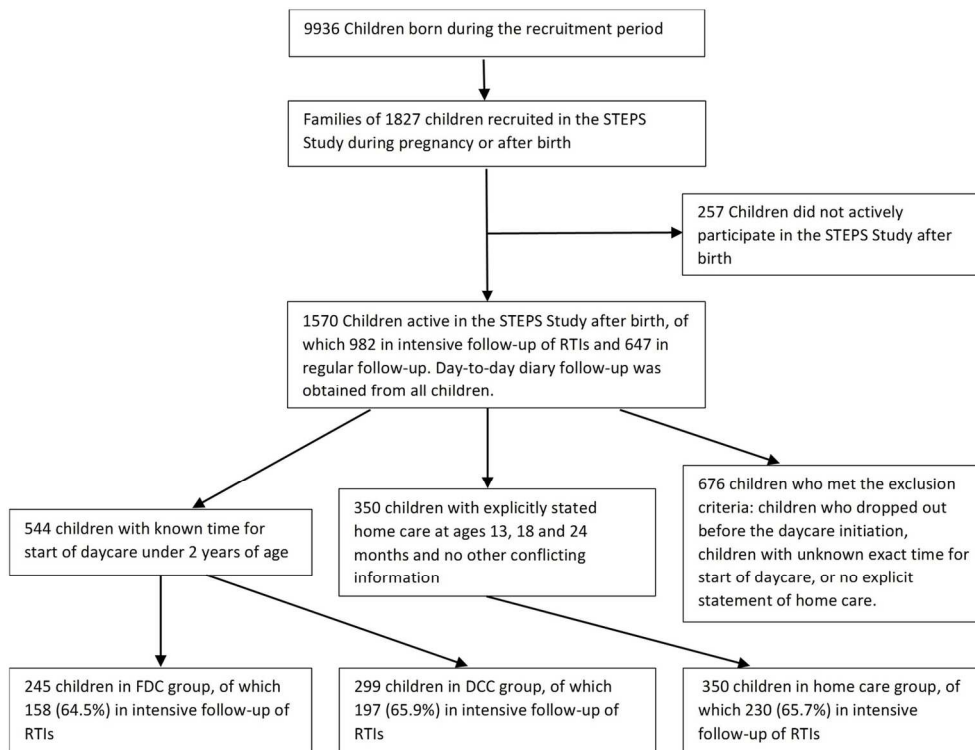

Flow-diagram of the recruitment and follow-up of study children.

66x50mm (600 x 600 DPI)

ew only

1  
2  
3  
4  
5  
6  
7  
8  
9  
10  
11  
12  
13  
14  
15  
16  
17  
18  
19  
20  
21  
22  
23  
24  
25  
26  
27  
28  
29  
30  
31  
32  
33  
34  
35  
36  
37  
38  
39  
40  
41  
42  
43  
44  
45  
46  
47  
48  
49  
50  
51  
52  
53  
54  
55  
56  
57  
58  
59  
60

1  
2  
3  
4  
5  
6  
7  
8  
9  
10  
11  
12  
13  
14  
15  
16  
17  
18  
19  
20  
21  
22  
23  
24  
25  
26  
27  
28  
29  
30  
31  
32  
33  
34  
35  
36  
37  
38  
39  
40  
41  
42  
43  
44  
45  
46  
47  
48  
49  
50  
51  
52  
53  
54  
55  
56  
57  
58  
59  
60

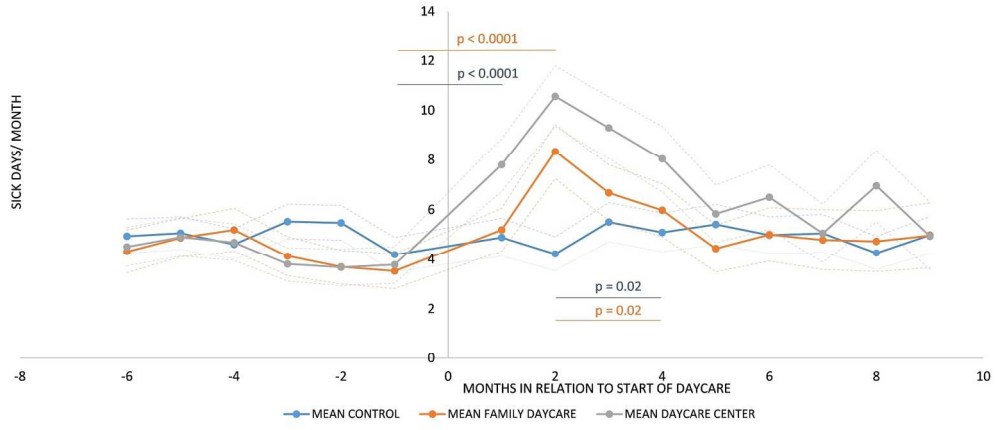

Means and 95% CIs (dashed lines) of sick days per month according to daycare groups in relation to start of daycare. Negative months denote the period prior to start of daycare. Horizontal lines indicate the shortest time for a significant rise (decline) from the last month prior to starting daycare (from the peak month).

173x86mm (300 x 300 DPI)

review only

1  
2  
3  
4  
5  
6  
7  
8  
9  
10  
11  
12  
13  
14  
15  
16  
17  
18  
19  
20  
21  
22  
23  
24  
25  
26  
27  
28  
29  
30  
31  
32  
33  
34  
35  
36  
37  
38  
39  
40  
41  
42  
43  
44  
45  
46  
47  
48  
49  
50  
51  
52  
53  
54  
55  
56  
57  
58  
59  
60

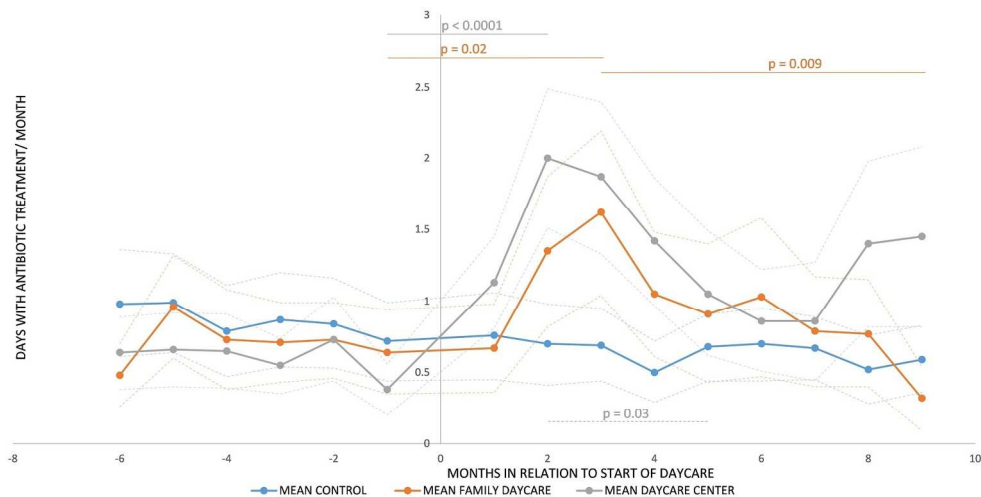

Means and 95% CIs (dashed lines) of days with antibiotic treatment per month according to daycare groups in relation to start of daycare. Negative months denote the period prior to start of daycare. Horizontal lines indicate the shortest time for a significant rise (decline) from the last month prior to starting daycare (from the peak month). Dashed lines: transiently below the significance level.

173x87mm (300 x 300 DPI)

Review only

1  
2  
3  
4  
5  
6  
7  
8  
9  
10  
11  
12  
13  
14  
15  
16  
17  
18  
19  
20  
21  
22  
23  
24  
25  
26  
27  
28  
29  
30  
31  
32  
33  
34  
35  
36  
37  
38  
39  
40  
41  
42  
43  
44  
45  
46  
47  
48  
49  
50  
51  
52  
53  
54  
55  
56  
57  
58  
59  
60

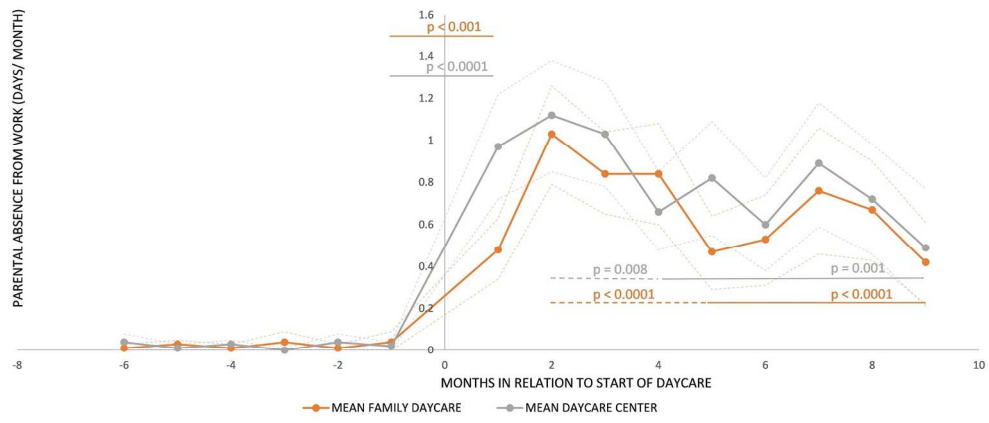

Means and 95% CIs (dashed lines) of days with parental absence from work per month according to daycare groups in relation to start of daycare. Negative months denote the period prior to start of daycare. Horizontal lines indicate the shortest time for a significant rise (decline) from the last month prior to starting daycare (from the peak month). Dashed lines: transiently below the significance level.

173x87mm (300 x 300 DPI)

Review only

Supplemental material: figures S1 and S2.

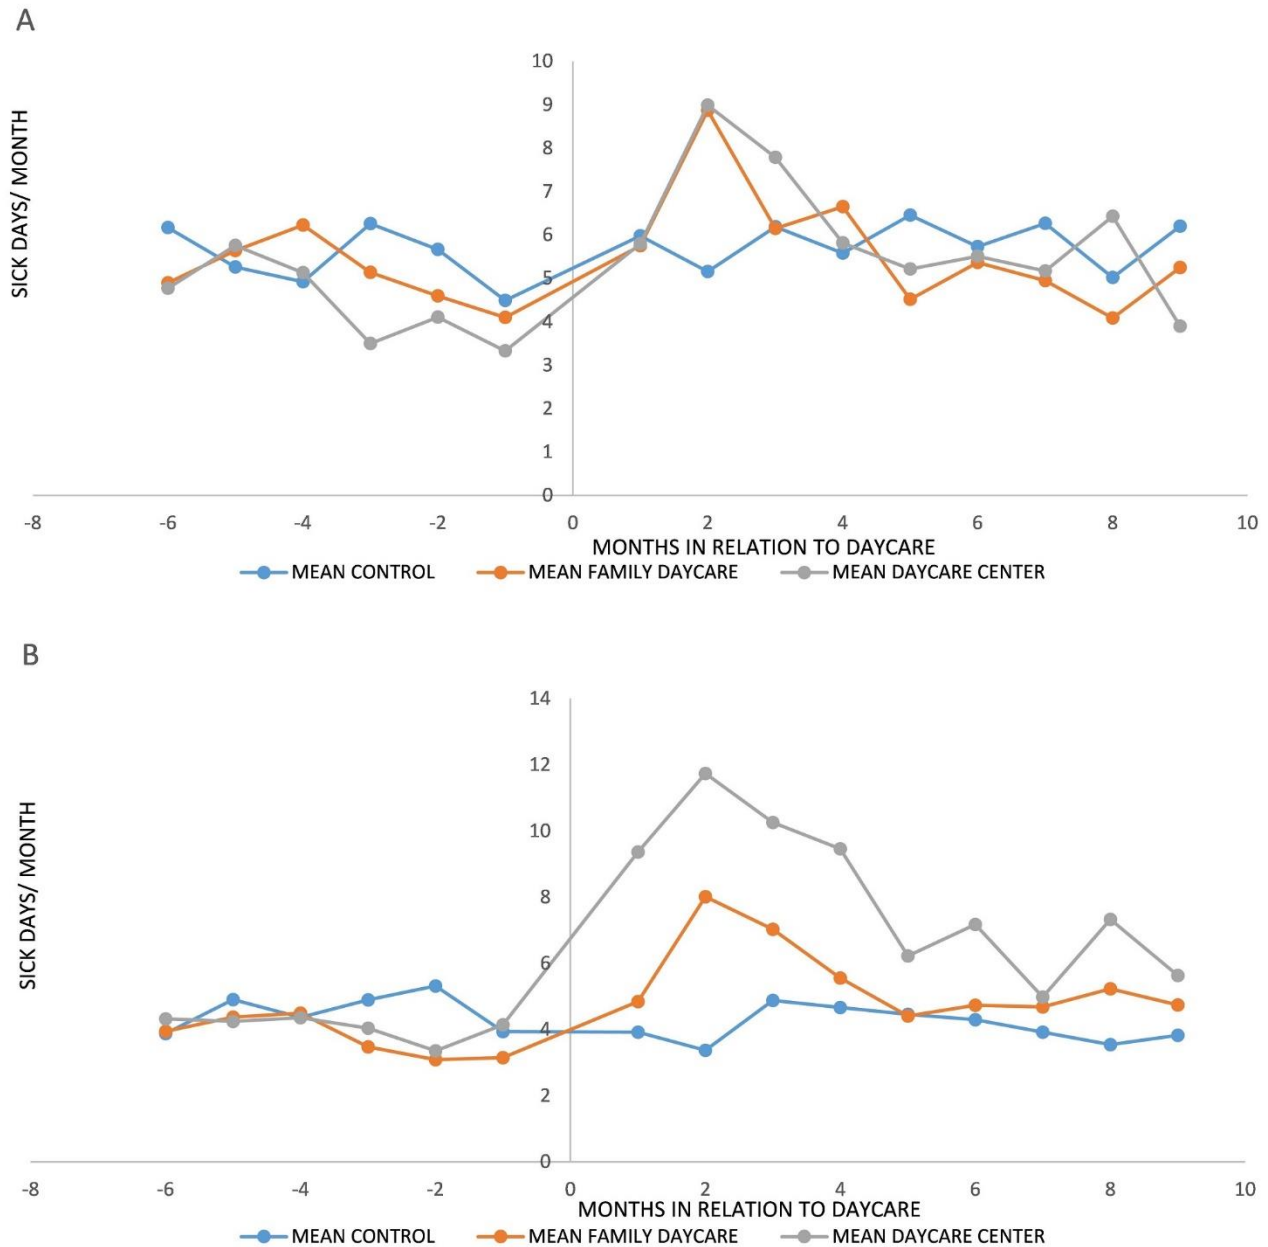

**Figure S1.** Mean sick days per month according to daycare groups in relation to start of daycare. Negative months denote the period prior to start of daycare. Data are shown for children with older siblings (A) and for children without older siblings (B).

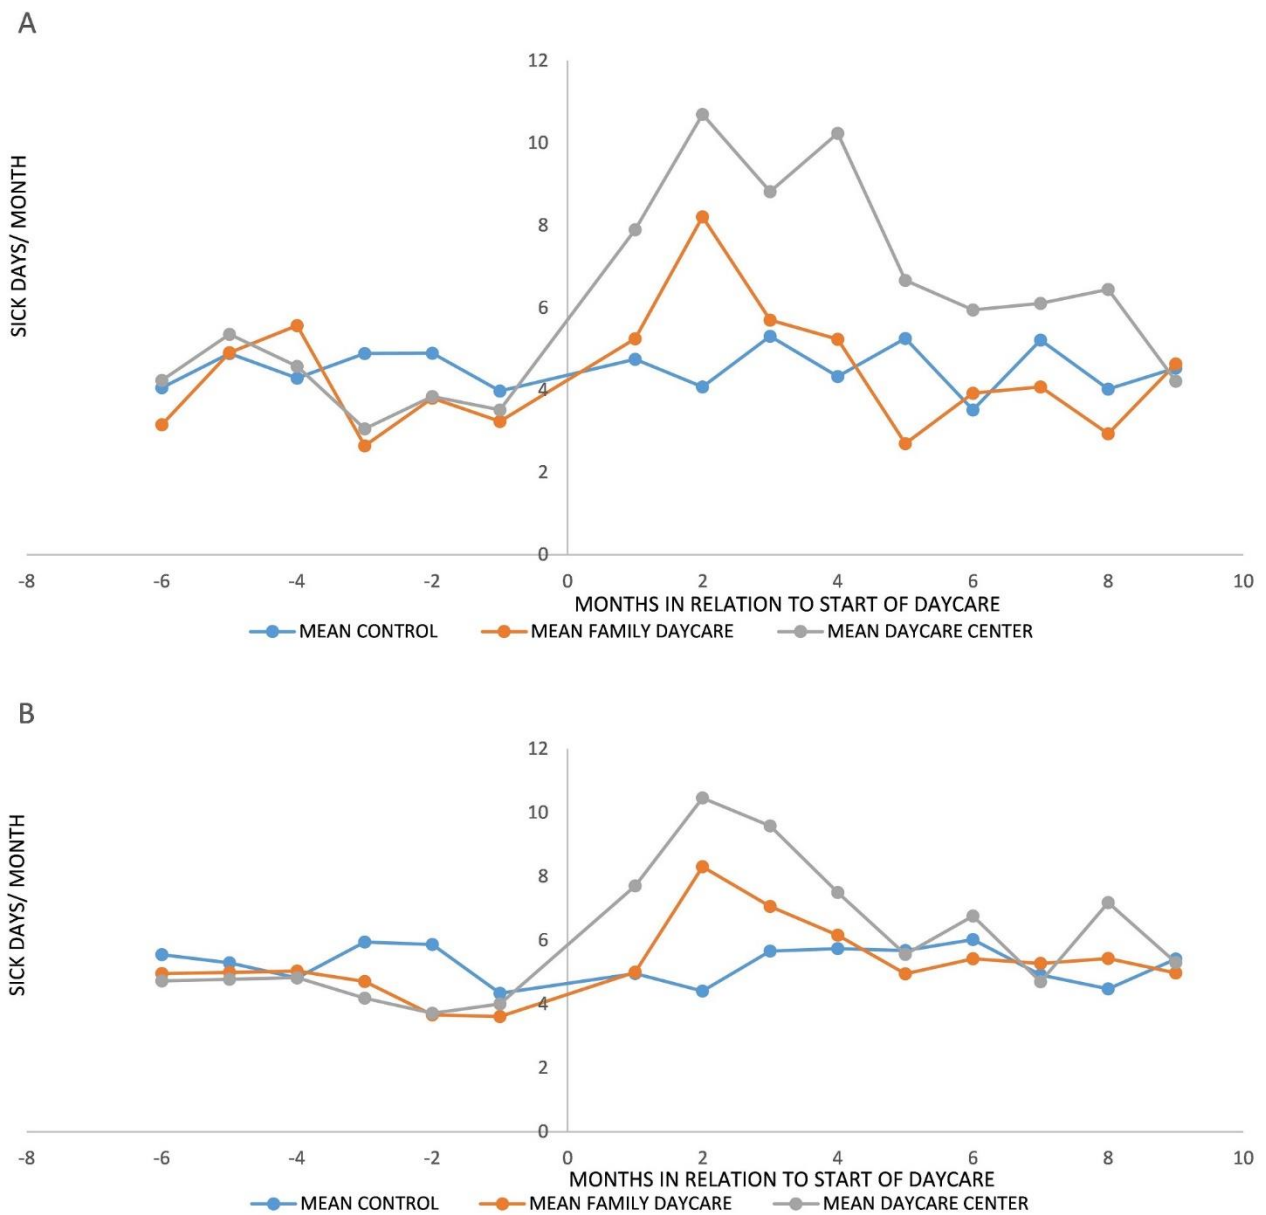

**Figure S2.** Mean sick days per month according to daycare groups in relation to start of daycare. Negative months denote the period prior to start of daycare. Data are shown for children of mothers with lower (A) and higher (B) post-secondary education.

**STROBE 2007 (v4) Statement—Checklist of items that should be included in reports of cohort studies**

Manuscript ID bmjopen-2016-014635, revision 1. Schuez-Havupalo L et al. Daycare attendance and respiratory tract infections: a prospective birth cohort study

| Section/Topic            | Item # | Recommendation                                                                                                                                                                       | Reported on page #             |
|--------------------------|--------|--------------------------------------------------------------------------------------------------------------------------------------------------------------------------------------|--------------------------------|
| Title and abstract       | 1      | (a) Indicate the study's design with a commonly used term in the title or the abstract                                                                                               | p 1                            |
|                          |        | (b) Provide in the abstract an informative and balanced summary of what was done and what was found                                                                                  | p 2                            |
| <b>Introduction</b>      |        |                                                                                                                                                                                      |                                |
| Background/rationale     | 2      | Explain the scientific background and rationale for the investigation being reported                                                                                                 | p 4-5                          |
| Objectives               | 3      | State specific objectives, including any prespecified hypotheses                                                                                                                     | p 5                            |
| <b>Methods</b>           |        |                                                                                                                                                                                      |                                |
| Study design             | 4      | Present key elements of study design early in the paper                                                                                                                              | p 5                            |
| Setting                  | 5      | Describe the setting, locations, and relevant dates, including periods of recruitment, exposure, follow-up, and data collection                                                      | p 5-6                          |
| Participants             | 6      | (a) Give the eligibility criteria, and the sources and methods of selection of participants. Describe methods of follow-up                                                           | p 5-6                          |
|                          |        | (b) For matched studies, give matching criteria and number of exposed and unexposed                                                                                                  | NA                             |
| Variables                | 7      | Clearly define all outcomes, exposures, predictors, potential confounders, and effect modifiers. Give diagnostic criteria, if applicable                                             | p 6-7                          |
| Data sources/measurement | 8*     | For each variable of interest, give sources of data and details of methods of assessment (measurement). Describe comparability of assessment methods if there is more than one group | p 5-7                          |
| Bias                     | 9      | Describe any efforts to address potential sources of bias                                                                                                                            | p 8 (cf. results/discussion)   |
| Study size               | 10     | Explain how the study size was arrived at                                                                                                                                            | p 5-6                          |
| Quantitative variables   | 11     | Explain how quantitative variables were handled in the analyses. If applicable, describe which groupings were chosen and why                                                         | p 7-8                          |
| Statistical methods      | 12     | (a) Describe all statistical methods, including those used to control for confounding                                                                                                | p 7-8                          |
|                          |        | (b) Describe any methods used to examine subgroups and interactions                                                                                                                  | p 8                            |
|                          |        | (c) Explain how missing data were addressed                                                                                                                                          | p 7-8 (cf. results/discussion) |

|                          |     |                                                                                                                                                                                                              |                  |
|--------------------------|-----|--------------------------------------------------------------------------------------------------------------------------------------------------------------------------------------------------------------|------------------|
|                          |     | (d) If applicable, explain how loss to follow-up was addressed                                                                                                                                               | p 8, 9           |
|                          |     | (e) Describe any sensitivity analyses                                                                                                                                                                        | p 8              |
| <b>Results</b>           |     |                                                                                                                                                                                                              |                  |
| Participants             | 13* | (a) Report numbers of individuals at each stage of study—eg numbers potentially eligible, examined for eligibility, confirmed eligible, included in the study, completing follow-up, and analysed            | p 8-9, fig 1     |
|                          |     | (b) Give reasons for non-participation at each stage                                                                                                                                                         | fig 1            |
|                          |     | (c) Consider use of a flow diagram                                                                                                                                                                           | fig 1            |
| Descriptive data         | 14* | (a) Give characteristics of study participants (eg demographic, clinical, social) and information on exposures and potential confounders                                                                     | p 8-10           |
|                          |     | (b) Indicate number of participants with missing data for each variable of interest                                                                                                                          | p 8-9, fig 1     |
|                          |     | (c) Summarise follow-up time (eg, average and total amount)                                                                                                                                                  | p 5, 7-8         |
| Outcome data             | 15* | Report numbers of outcome events or summary measures over time                                                                                                                                               | p 9, table 1     |
| Main results             | 16  | (a) Give unadjusted estimates and, if applicable, confounder-adjusted estimates and their precision (eg, 95% confidence interval). Make clear which confounders were adjusted for and why they were included | p 11-15, table 2 |
|                          |     | (b) Report category boundaries when continuous variables were categorized                                                                                                                                    | tables 1 and 2   |
|                          |     | (c) If relevant, consider translating estimates of relative risk into absolute risk for a meaningful time period                                                                                             | NA               |
| Other analyses           | 17  | Report other analyses done—eg analyses of subgroups and interactions, and sensitivity analyses                                                                                                               | p 8-9            |
| <b>Discussion</b>        |     |                                                                                                                                                                                                              |                  |
| Key results              | 18  | Summarise key results with reference to study objectives                                                                                                                                                     | p 15             |
| <b>Limitations</b>       |     |                                                                                                                                                                                                              |                  |
| Interpretation           | 20  | Give a cautious overall interpretation of results considering objectives, limitations, multiplicity of analyses, results from similar studies, and other relevant evidence                                   | p 15-17          |
| Generalisability         | 21  | Discuss the generalisability (external validity) of the study results                                                                                                                                        | p 17             |
| <b>Other information</b> |     |                                                                                                                                                                                                              |                  |
| Funding                  | 22  | Give the source of funding and the role of the funders for the present study and, if applicable, for the original study on which the present article is based                                                | p 18             |

\*Give information separately for cases and controls in case-control studies and, if applicable, for exposed and unexposed groups in cohort and cross-sectional studies.



1  
2  
3  
4 **Note:** An Explanation and Elaboration article discusses each checklist item and gives methodological background and published examples of transparent reporting. The STROBE  
5 checklist is best used in conjunction with this article (freely available on the Web sites of PLoS Medicine at <http://www.plosmedicine.org/>, Annals of Internal Medicine at  
6 <http://www.annals.org/>, and Epidemiology at <http://www.epidem.com/>). Information on the STROBE Initiative is available at [www.strobe-statement.org](http://www.strobe-statement.org).  
7  
8  
9  
10  
11  
12  
13  
14  
15  
16  
17  
18  
19  
20  
21  
22  
23  
24  
25  
26  
27  
28  
29  
30  
31  
32  
33  
34  
35  
36  
37  
38  
39  
40  
41  
42  
43  
44  
45  
46  
47  
48  
49

For peer review only
