# Supplementary material for: Daycare attendance and respiratory tract infections: a prospective birth cohort study
Source: PubMed Central journal article supplement — BMJ Open. 2017 Sep 5;7(9):e014635. doi: 10.1136/bmjopen-2016-014635 (PMC5588939; doi:10.1136/bmjopen-2016-014635), 2017-09-05
Supplement: bmjopen-2016-014635supp001.pdf [file bmjopen-2016-014635supp001.pdf]

Supplemental material: figures S1 and S2.

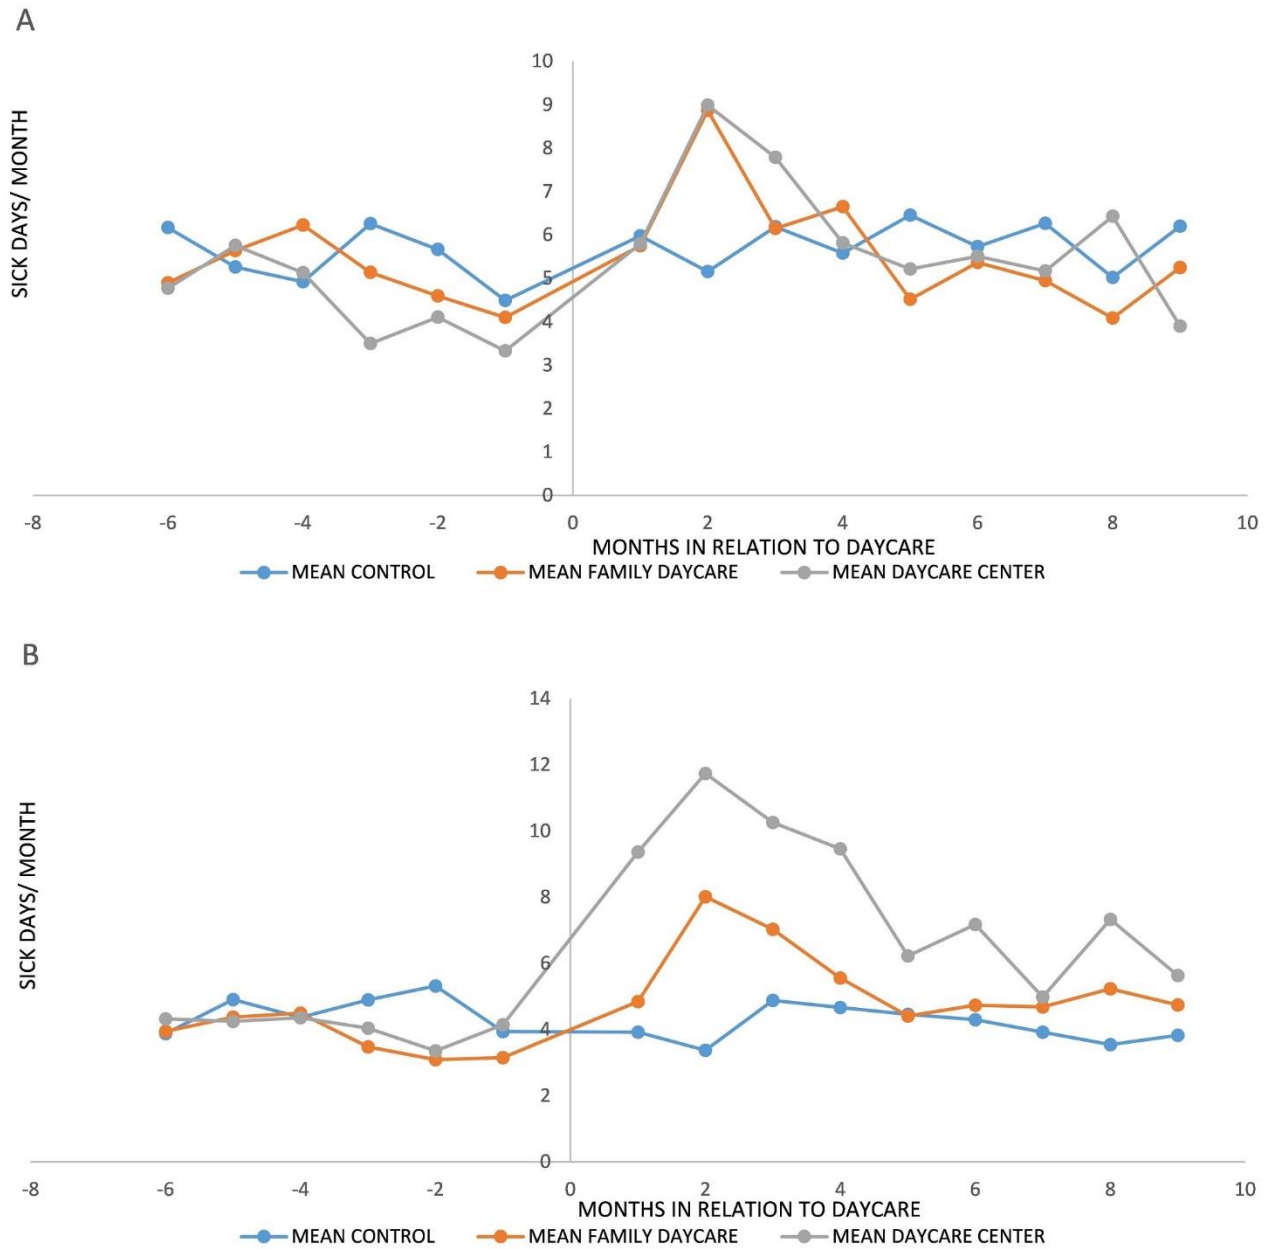

**Figure S1.** Mean sick days per month according to daycare groups in relation to start of daycare. Negative months denote the period prior to start of daycare. Data are shown for children with older siblings (A) and for children without older siblings (B).

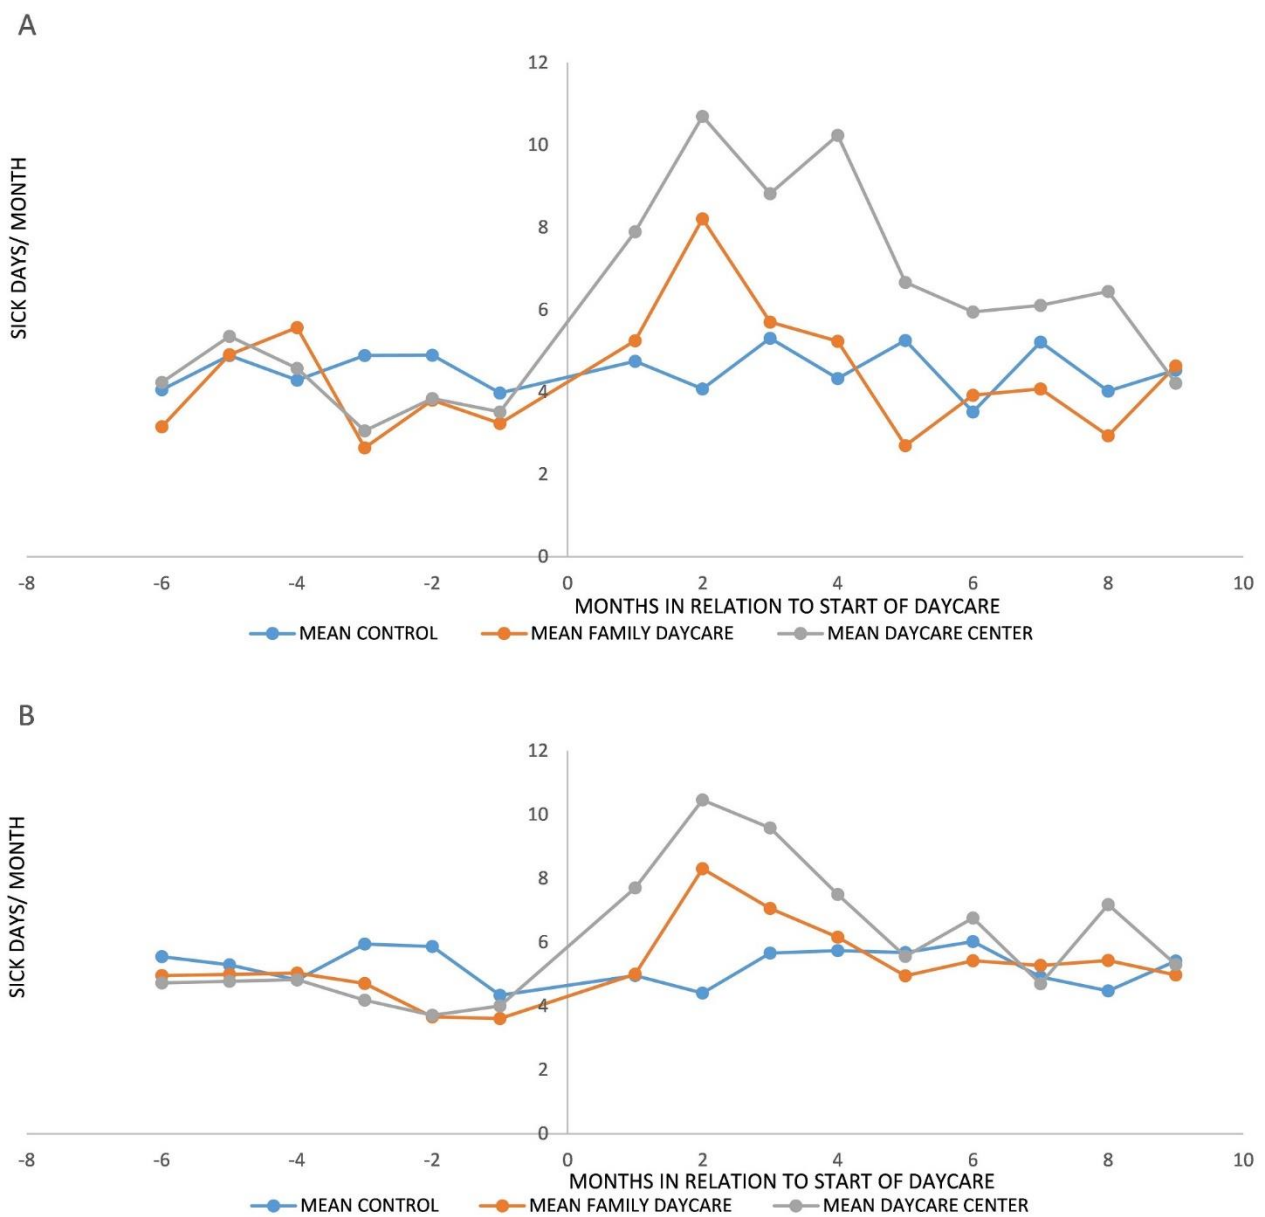

**Figure S2.** Mean sick days per month according to daycare groups in relation to start of daycare. Negative months denote the period prior to start of daycare. Data are shown for children of mothers with lower (A) and higher (B) post-secondary education.
